# Supplementary material for: Rational design of crystalline two-dimensional frameworks with highly complicated topological structures
Source: PubMed Central journal article supplement (PMC6787252; doi:10.1038/s41467-019-12596-6), 2019-10-10
Supplement: 41467_2019_12596_MOESM1_ESM.pdf [file 41467_2019_12596_MOESM1_ESM.pdf]

# **Supplementary Information**

**Rational design of crystalline two-dimensional frameworks  
with highly complicated topological structures**

Liang *et al.*

## Table of contents

|                                                                                                                           |         |
|---------------------------------------------------------------------------------------------------------------------------|---------|
| <b>Supplementary Methods</b> .....                                                                                        | S3-S10  |
| <b>Supplementary Figure 1.</b> Synthetic routes to TPM and FPM.....                                                       | S5      |
| <b>Supplementary Figure 2.</b> Synthetic procedures of the COFs.....                                                      | S11     |
| <b>Supplementary Figures 3-4.</b> FT-IR spectra of the monomers, Tri-COF-DAB and Tetra-COF-DAB.....                       | S11-S12 |
| <b>Supplementary Figures 5-6.</b> Solid-state $^{13}\text{C}$ CP/MAS NMR spectra of Tri-COF-DAB and Tetra-COF-DAB.....    | S12-S13 |
| <b>Supplementary Figure 7.</b> TGA profiles of the COFs.....                                                              | S13     |
| <b>Supplementary Figure 8.</b> Illustrations of AA and AB stacking models.....                                            | S14     |
| <b>Supplementary Figure 9.</b> The close-up views of the simulated PXRD patterns of the COFs with AA stacking models..... | S14     |
| <b>Supplementary Figures 10-11.</b> FT-IR spectra of the monomers, Tri-COF-BZ and Tetra-COF-BZ.....                       | S15     |
| <b>Supplementary Figures 12-13.</b> Solid-state $^{13}\text{C}$ CP/MAS NMR spectra of Tri-COF-BZ and Tetra-COF-BZ.....    | S16     |
| <b>Supplementary Figure 14.</b> SEM images of the COFs.....                                                               | S17     |
| <b>Supplementary Figure 15.</b> TEM images of the COFs.....                                                               | S17     |
| <b>Supplementary Figure 16.</b> BET surface area plots of the COFs.....                                                   | S18     |
| <b>Supplementary Figure 17.</b> Theoretical $\text{N}_2$ adsorption–desorption isotherms of the COFs.....                 | S18     |
| <b>Supplementary Figure 18.</b> Theoretical BET surface area plots of the COFs.....                                       | S19     |
| <b>Supplementary Figure 19.</b> PSD profiles of Tetra-COF-BZ.....                                                         | S20     |
| <b>Supplementary Tables 1-4.</b> Fractional atomic coordinates of the COFs.....                                           | S20-S30 |
| <b>Supplementary Figures 20-39.</b> $^1\text{H}$ NMR and $^{13}\text{C}$ NMR spectra of the new compounds.....            | S31-S40 |
| <b>Supplementary References</b> .....                                                                                     | S41     |

## **Supplementary Methods**

### **Fourier transform infrared spectroscopy (FT-IR)**

Fourier transform infrared spectroscopy (FT-IR) was carried out with a Nicolet 380 FT-IR spectrometer. The samples for IR study were prepared as KBr pellets.

### **Solid-state nuclear magnetic resonance (NMR) spectroscopy**

The  $^{13}\text{C}$  CP/MAS NMR spectra of the COFs were recorded on an Agilent DD2 600 Solid NMR System with 4 mm zirconia rotors. The spinning rate is 9 kHz and the contact time is 3 ms.

### **Thermal gravimetric analysis (TGA)**

Thermal gravimetric analysis was conducted on a Waters TGA Q500 by heating the samples from 25 to 1000 °C under nitrogen atmosphere with a heating rate of 10 °C/min.

### **Scanning electron microscopy (SEM)**

Scanning electron microscopy was carried out using a FEI NOVA NANOSEM 450 scanning electron microscope. The samples were dispersed over the slices of silicon wafers adhered to flat copper platform sample holders and then coated with gold using a sputter coater (ambient temperature, 85 torr pressure in an nitrogen atmosphere, pattered for 30 s from a solid gold target at a current at 30 mA) before being submitted to SEM characterization.

### **Transmission electron microscopy (TEM)**

Transmission electron microscopy was performed on a JEOL JEM-2100F instrument with an accelerating voltage of 200 kV. The samples were dispersed over the carbon coated copper grids.

### **Powder X-ray diffraction**

Powder X-ray diffraction measurement was carried out with an PANalytical X'Pert

Powder system using monochromated Cu/K $\alpha$ ( $\lambda$ = 0.1542 nm). The samples were spread on the square recess of XRD sample holder as thin layers.

### **Nitrogen adsorption-desorption isotherm measurement**

The measurements were carried out using Micromeritics ASAP 2020 or Quantachrome autosorb iq systems. Before gas adsorption measurements, the as-synthesized COFs were activated by being immersed in anhydrous 1,4-dioxane for 6 h for 3 times. The solvent was decanted and the samples were dried under dynamic vacuum at 120 °C for 4 h. The resulting samples were then activated by degassing at 200 °C for 4 h and used for gas adsorption measurements from 0 to 1 atm at 77 K. The Brunauer-Emmett-Teller (BET) method was utilized to calculate their specific surface areas.

### **Structural simulation and powder X-ray diffraction analysis**

The models of the triple-pore and tetrad-pore COFs with eclipsed stacking (AA, space group  $P2$ ) and staggered stacking (AB, space group  $P1$ ) were established using Accelrys Materials Studio 7.0 software. The structural models were optimized by the Forcite module, which gave the total energies at the same time. The simulated PXRD patterns were determined by the Reflex module. Pawley refinements of the experimental PXRD profiles were conducted by TOPAS software.

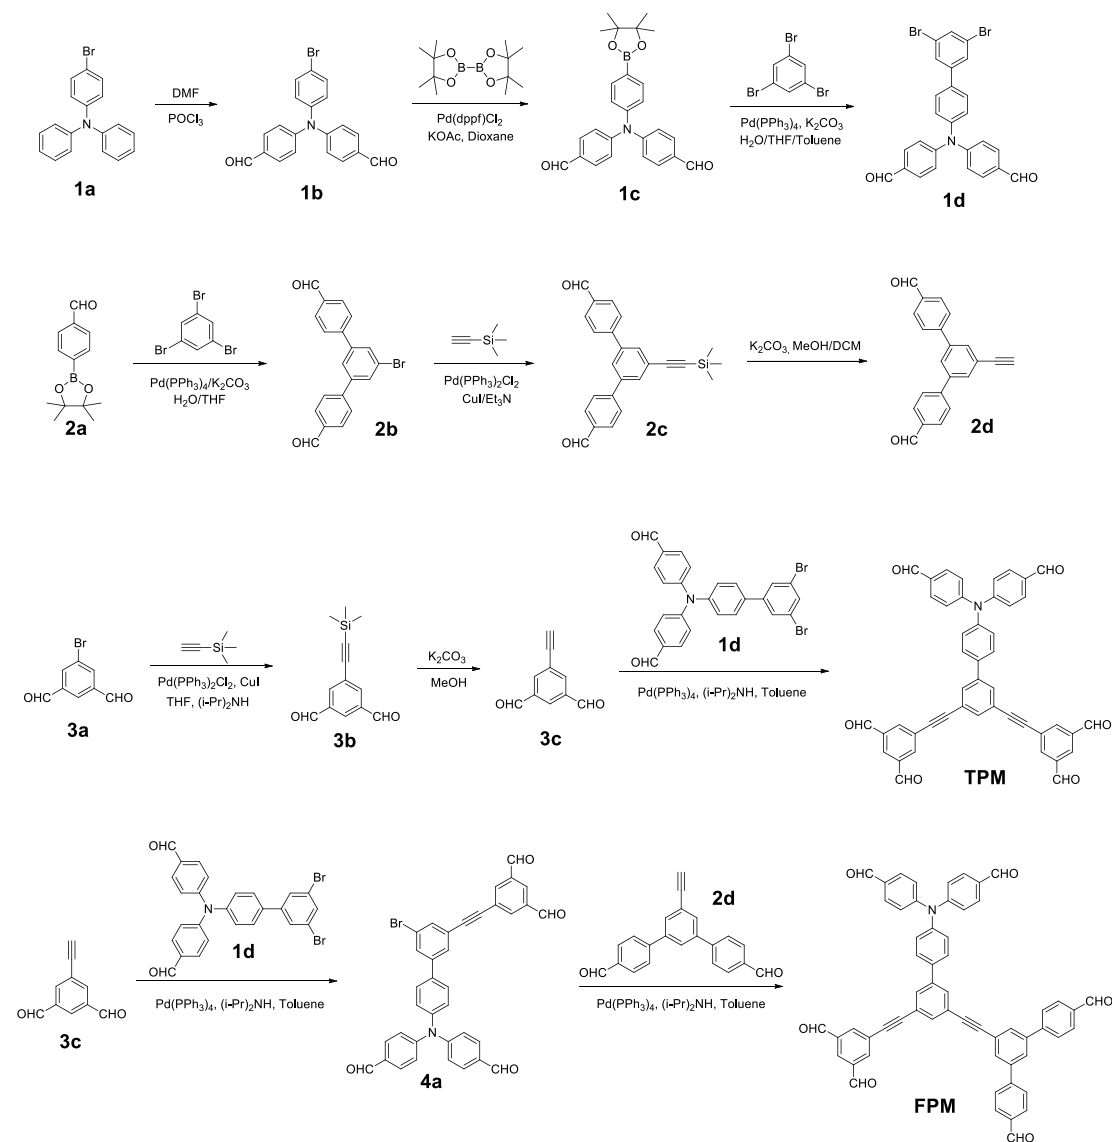

**Supplementary Figure 1.** Synthetic routes to TPM and FPM.

### Synthesis of 1c

Compound 1b (4.00 g, 10.52 mmol, synthesized according to the reported procedure<sup>1</sup>), bis(pinacolato)diboron (4.12 g, 16.22 mmol), Potassium acetate (3.40 g, 34.64 mmol) and Pd(dppf)Cl<sub>2</sub> (0.84 g, 1.15 mmol) were mixed in dioxane (160 mL). The flask was cooled to -78 °C and subjected to three evacuation/nitrogen fill cycles. The reaction mixture was gradually warmed to room temperature, and stirred at 85 °C for 24 h under N<sub>2</sub> atmosphere. After cooling to room temperature, the solvent was evaporated to dryness under reduced pressure. And then the crude product was subjected to silica gel chromatography with petroleum ether/CH<sub>2</sub>Cl<sub>2</sub> (1/1, v/v) as eluent to give 1c as a

yellow solid (3.73 g, 83%).  $^1\text{H}$  NMR (500 MHz,  $\text{CDCl}_3$ ):  $\delta$  9.90 (s, 2H), 7.81 (d,  $J = 8.3$  Hz, 2H), 7.78 (d,  $J = 8.6$  Hz, 4H), 7.19 (d,  $J = 8.6$  Hz, 4H), 7.15 (d,  $J = 8.3$  Hz, 2H), 1.36 (s, 12H).  $^{13}\text{C}$  NMR (101 MHz,  $\text{CDCl}_3$ ):  $\delta$  190.75, 152.03, 148.39, 136.77, 131.78, 131.51, 125.77, 123.48, 84.22, 25.07. MS (MALDI):  $m/z$  427.0  $[\text{M}+\text{H}]^+$ . HRMS (DART Positive Ion Mode): Calcd. for  $\text{C}_{26}\text{H}_{27}\text{O}_4\text{NB}$   $[\text{M}+\text{H}]^+$  : 427.2064. Found: 427.2061.

### Synthesis of 1d

Compound 1c (3.00 g, 7.02 mmol), tribromobenzene (6.00 g, 19.06 mmol),  $\text{Pd}(\text{PPh}_3)_4$  (0.83 mg, 0.72 mmol) and  $\text{K}_2\text{CO}_3$  (6.40 g, 46.31 mmol) were mixed in a solution of toluene (100 mL), THF (20 mL) and  $\text{H}_2\text{O}$  (30 mL). The flask was cooled to  $-78$  °C and subjected to three evacuation/nitrogen fill cycles. Then the mixture was refluxed under a nitrogen atmosphere for 48 h at  $80$  °C. After being cooled to room temperature, the mixture was extracted with  $\text{CHCl}_2$ . The organic layer was washed with water and brine and then dried over sodium sulfate. After removal of the solvents, the residue was purified by silica gel chromatography (eluent: petroleum ether/ $\text{CH}_2\text{Cl}_2 = 1/3$ ) to yield 1d as a yellow powder (2.63 g, 70%).  $^1\text{H}$  NMR (500 MHz,  $\text{CDCl}_3$ ):  $\delta$  9.92 (s, 2H), 7.81 (d,  $J = 8.7$  Hz, 4H), 7.66 (s, 3H), 7.53 (d,  $J = 8.6$  Hz, 2H), 7.23 (dd,  $J = 8.5, 6.4$  Hz, 6H).  $^{13}\text{C}$  NMR (126 MHz,  $\text{CDCl}_3$ ):  $\delta$  190.68, 151.93, 146.10, 143.76, 135.95, 133.04, 131.91, 131.61, 128.98, 128.94, 127.12, 123.64, 123.42. MS (MALDI):  $m/z$  534.1  $[\text{M}+\text{H}]^+$ . HRMS (DART Positive Ion Mode): Calcd. for  $\text{C}_{26}\text{H}_{18}\text{O}_2\text{NBr}_2$   $[\text{M}+\text{H}]^+$  : 533.9699. Found: 533.9699.

### Synthesis of 2b

Compound 2a (3.01 g, 12.97 mmol), tribromobenzene (2.03 g, 6.45 mmol),  $\text{Pd}(\text{PPh}_3)_4$  (1.51 g, 1.31 mmol) and  $\text{K}_2\text{CO}_3$  (11.87 g, 85.89 mmol) were added in a three-necked, round-bottomed flask. After three evacuation/nitrogen fill cycles, THF (150 mL) and  $\text{H}_2\text{O}$  (30 mL) were injected into the flask under nitrogen atmosphere. Then the mixture was refluxed for 3 days at  $75$  °C. After being cooled to room temperature, the mixture was extracted with  $\text{CH}_2\text{Cl}_2$ . The organic layer was washed with water and

brine and dried over sodium sulfate. After removal of the solvents, the residue was purified by silica gel chromatography (eluent: petroleum ether/ethyl acetate = 8/1) to yield 2b as a white powder (1.67 g, 71%). <sup>1</sup>H NMR (500 MHz, CDCl<sub>3</sub>): δ 10.09 (s, 2H), 8.00 (d, *J* = 8.1 Hz, 4H), 7.80 (dd, *J* = 14.7, 4.7 Hz, 7H). <sup>13</sup>C NMR (126 MHz, CDCl<sub>3</sub>): δ 191.88, 145.40, 142.73, 136.11, 130.62, 130.42, 128.09, 125.40, 123.97. MS (DART Positive Ion Mode): *m/z* 365.0 [M+H]<sup>+</sup>. HRMS (DART Positive Ion Mode): Calcd. for C<sub>20</sub>H<sub>14</sub>O<sub>2</sub>Br [M+H]<sup>+</sup> : 365.0172. Found: 365.0171.

### Synthesis of 2c

A 100 mL two-neck round bottom flask was charged with compound 2b (1.16 g, 3.18 mmol), CuI (31 mg, 0.16 mmol), Pd(PPh<sub>3</sub>)<sub>2</sub>Cl<sub>2</sub> (228 mg, 0.32 mmol) in triethylamine (35 mL) under nitrogen atmosphere. Trimethylsilylacetylene (1.9 mL, 13.44 mmol) was added dropwise to the mixture under high nitrogen flow and the reaction continued at room temperature for 2 days. The solvent was removed under vacuum and the crude product was purified by silica gel chromatography using a mixture of petroleum ether/ethyl acetate = 8/1 as eluent to afford 2c as a yellow solid (0.81 g, 66%). <sup>1</sup>H NMR (500 MHz, DMSO-*d*<sub>6</sub>): δ 10.09 (s, 2H), 8.15 (s, 1H), 8.11 (d, *J* = 8.2 Hz, 4H), 8.02 (d, *J* = 8.3 Hz, 4H), 7.90 (d, *J* = 1.6 Hz, 2H), 0.28 (s, 9H). <sup>13</sup>C NMR (101 MHz, DMSO-*d*<sub>6</sub>): δ 192.85, 144.34, 140.19, 135.55, 130.08, 130.01, 127.91, 126.65, 123.86, 104.50, 95.32, -0.12. MS (DART Positive Ion Mode): *m/z* 383.1 [M+H]<sup>+</sup>. HRMS (DART Positive Ion Mode): Calcd. for C<sub>25</sub>H<sub>23</sub>O<sub>2</sub>Si [M+H]<sup>+</sup> : 383.1462. Found: 383.1460.

### Synthesis of 2d

A mixture of compound 2c (379 mg, 0.99 mmol) and K<sub>2</sub>CO<sub>3</sub> (289 mg, 2.09 mmol) was dissolved in a solvent mixture of dichloromethane (6 mL) and methanol (9 mL). After three evacuation/nitrogen fill cycles, the mixture was stirred at room temperature for 24 h. Then, 20 mL water was added into the system, and the mixture was extracted with CH<sub>2</sub>Cl<sub>2</sub>. The organic layer was washed with brine and dried over sodium sulfate. After removal of the solvents, the crude product was purified by silica

gel chromatography using petroleum ether/ethyl acetate (8/1) as eluent to obtain 2d as a white solid (0.18 g, 58%). <sup>1</sup>H NMR (500 MHz, CDCl<sub>3</sub>): δ 10.09 (s, 2H), 8.00 (d, *J* = 7.9 Hz, 4H), 7.84 (s, 1H), 7.82 – 7.78 (m, 6H), 3.20 (s, 1H). <sup>13</sup>C NMR (126 MHz, CDCl<sub>3</sub>): δ 191.94, 145.88, 141.13, 135.97, 131.04, 130.61, 128.04, 127.01, 124.00, 82.97, 78.64. MS (DART Positive Ion Mode): *m/z* 311.1 [M+H]<sup>+</sup>. HRMS (DART Positive Ion Mode): Calcd. for C<sub>22</sub>H<sub>15</sub>O<sub>2</sub> [M+H]<sup>+</sup> : 311.1067. Found: 311.1066.

### Synthesis of 3b

A 250 mL three-necked round-bottomed flask was charged with compound 3a (9.20 g, 43.19 mmol), CuI (250 mg, 1.31 mmol), Pd(PPh<sub>3</sub>)<sub>2</sub>Cl<sub>2</sub> (910 mg, 1.30 mmol) in THF (100 mL) and diisopropylamine (45 mL) under nitrogen atmosphere and stirred for 5 min at room temperature. Trimethylsilylacetylene (11 mL, 77.81 mmol) was added dropwise to the mixture under high nitrogen flow and the reaction continued at room temperature for 3 h. The solvent was removed under vacuum and the crude product was purified by silica gel chromatography using a mixture of petroleum ether/CH<sub>2</sub>Cl<sub>2</sub> (4/1) as eluent to afford 3b as a light yellow solid (6.37 g, 64%). <sup>1</sup>H NMR (500 MHz, CDCl<sub>3</sub>): δ 10.08 (s, 2H), 8.30 (t, *J* = 1.5 Hz, 1H), 8.19 (d, *J* = 1.5 Hz, 2H), 0.28 (s, 9H). <sup>13</sup>C NMR (101 MHz, CDCl<sub>3</sub>): δ 167.82, 125.73, 125.24, 119.32, 116.20, 97.08, 94.39, 15.39. MS (DART Positive Ion Mode): *m/z* 231.1 [M+H]<sup>+</sup>. HRMS (DART Positive Ion Mode): Calcd. for C<sub>13</sub>H<sub>15</sub>O<sub>2</sub>Si [M+H]<sup>+</sup> : 231.0836. Found: 231.0835.

### Synthesis of 3c

A mixture of compound 3b (2.14 g, 9.29 mmol) and K<sub>2</sub>CO<sub>3</sub> (1.28 g, 9.26 mmol) was dissolved in methanol (60 mL). After three evacuation/nitrogen fill cycles, the mixture was stirred at room temperature for 3 h. Then, 50 mL water was added into the system, and the mixture was extracted with CH<sub>2</sub>Cl<sub>2</sub>. The organic layer was washed with brine and dried over sodium sulfate. After removal of the solvents, the crude product was purified by silica gel chromatography (petroleum ether/CH<sub>2</sub>Cl<sub>2</sub> = 1/1) to give 3c as a white solid (1.44 g, 98%). <sup>1</sup>H NMR (500 MHz, CDCl<sub>3</sub>): δ 10.09 (s, 2H), 8.35 (t, *J* = 1.4 Hz, 1H), 8.23 (d, *J* = 1.5 Hz, 2H), 3.27 (s, 1H). <sup>13</sup>C NMR (126 MHz, CDCl<sub>3</sub>): δ



190.30, 138.00, 137.34, 130.34, 124.93, 81.03, 80.76. MS (DART Positive Ion Mode):  $m/z$  159.0  $[M+H]^+$ . HRMS (DART Positive Ion Mode): Calcd. for  $C_{10}H_7O_2 [M+H]^+$  : 159.0441. Found: 159.0440.

### Synthesis of 4a

Compound **3c** (590 mg, 3.73 mmol), compound **1d** (2.00 g, 3.74 mmol) and  $Pd(PPh_3)_4$  (646 mg, 0.56 mmol) were mixed in toluene (105 mL) and diisopropylamine (35 mL). Then the mixture was subjected to three evacuation/nitrogen fill cycles and heated at 80 °C for 2 days under nitrogen atmosphere. After the solution cooled down, the ammonium salt was filtered. The filtrate was evaporated and the residue was purified by silica gel chromatography (petroleum ether/ethyl acetate = 3/1) to give **4a** as a yellow solid (1.27 g, 56%).  $^1H$  NMR (500 MHz,  $CDCl_3$ ):  $\delta$  10.12 (s, 2H), 9.93 (s, 2H), 8.35 (t,  $J = 1.5$  Hz, 1H), 8.28 (d,  $J = 1.5$  Hz, 2H), 7.82 (d,  $J = 8.7$  Hz, 4H), 7.76 (t,  $J = 1.7$  Hz, 1H), 7.72 (t,  $J = 1.5$  Hz, 1H), 7.71 – 7.70 (m, 1H), 7.59 (d,  $J = 8.7$  Hz, 2H), 7.27 (s, 1H), 7.26 (s, 1H), 7.24 (d,  $J = 8.6$  Hz, 4H).  $^{13}C$  NMR (126 MHz,  $CDCl_3$ ):  $\delta$  190.69, 190.34, 151.96, 146.04, 142.49, 137.47, 137.40, 136.34, 133.37, 131.62, 130.32, 129.13, 128.94, 127.18, 125.46, 124.71, 123.42, 123.14, 90.94, 88.20. MS (MALDI):  $m/z$  612.0  $[M+H]^+$ . HRMS (DART Positive Ion Mode): Calcd. for  $C_{36}H_{23}O_4NBr [M+H]^+$  : 612.0805. Found: 612.0800.

### Synthesis of TPM

Compound **3c** (122 mg, 0.77 mmol), compound **1d** (104 mg, 0.19 mmol) and  $Pd(PPh_3)_4$  (34 mg, 0.029 mmol) were mixed in toluene (30 mL) and diisopropylamine (10 mL). Then the mixture was subjected to three evacuation/nitrogen fill cycles and heated at 80 °C for 2 days under nitrogen atmosphere. After the solution was cooled down to room temperature, the ammonium salt was filtered. The filtrate was evaporated and the residue was purified by silica gel chromatography ( $CH_2Cl_2$ /ethyl acetate = 10/1) to give TPM as a yellow solid (83 mg, 62%).  $^1H$  NMR (500 MHz,  $CDCl_3$ ):  $\delta$  10.13 (s, 4H), 9.93 (s, 2H), 8.36 (d,  $J = 1.4$  Hz, 2H), 8.30 (d,  $J = 1.4$  Hz, 4H), 7.83 (d,  $J = 8.7$  Hz, 6H), 7.76 (s, 1H), 7.66 (d,  $J = 8.5$  Hz, 2H), 7.29 (d,  $J = 8.6$

Hz, 2H), 7.26 (d,  $J = 7.9$  Hz, 4H).  $^{13}\text{C}$  NMR (126 MHz,  $\text{CDCl}_3$ ):  $\delta$  190.70, 190.37, 151.98, 145.96, 141.23, 137.46, 137.37, 136.68, 133.79, 131.88, 131.61, 130.92, 130.34, 128.92, 127.22, 125.56, 123.63, 123.40, 91.38, 87.93. MS (MALDI):  $m/z$  689.1  $[\text{M}]^+$ . HRMS (DART Positive Ion Mode): Calcd. for  $\text{C}_{46}\text{H}_{27}\text{O}_6\text{N}$   $[\text{M}]^+$  : 689.1833. Found: 689.1831.

### Synthesis of FPM

Compound 4a (480 mg, 0.78 mmol), compound 2d (240 mg, 0.77 mmol) and  $\text{Pd}(\text{PPh}_3)_4$  (113 mg, 0.098 mmol) were mixed in toluene (36 mL) and diisopropylamine (12 mL). Then the mixture was subjected to three evacuation/nitrogen fill cycles and heated at 80 °C for 2 days under nitrogen atmosphere. After the solution cooled down, the ammonium salt was filtered, the filtrate was evaporated and the residue was purified by silica gel chromatography ( $\text{CH}_2\text{Cl}_2/\text{ethyl acetate} = 30/1$ ) to give FPM as a yellow solid (209 mg, 32%).  $^1\text{H}$  NMR (500 MHz,  $\text{CDCl}_3$ ):  $\delta$  10.13 (s, 2H), 10.10 (s, 2H), 9.93 (s, 2H), 8.35 (s, 1H), 8.30 (s, 2H), 8.02 (d,  $J = 8.0$  Hz, 4H), 7.89 – 7.85 (m, 5H), 7.85 – 7.81 (m, 7H), 7.79 (d,  $J = 9.4$  Hz, 2H), 7.66 (d,  $J = 8.3$  Hz, 2H), 7.29 (d,  $J = 8.3$  Hz, 2H), 7.26 (d,  $J = 8.5$  Hz, 4H).  $^{13}\text{C}$  NMR (126 MHz,  $\text{CDCl}_3$ ):  $\delta$  191.90, 190.68, 190.37, 151.97, 145.87, 141.25, 141.11, 137.44, 137.31, 136.82, 136.00, 133.76, 131.85, 131.59, 130.85, 130.62, 130.56, 130.45, 130.33, 128.90, 128.04, 127.21, 126.86, 125.59, 124.60, 124.27, 123.50, 123.36, 91.55, 89.97, 89.47, 87.79. MS (MALDI):  $m/z$  842.4  $[\text{M}+\text{H}]^+$ . HRMS (DART Positive Ion Mode): Calcd. for  $\text{C}_{58}\text{H}_{36}\text{O}_6\text{N}$   $[\text{M}+\text{H}]^+$  : 842.2537. Found: 842.2531.

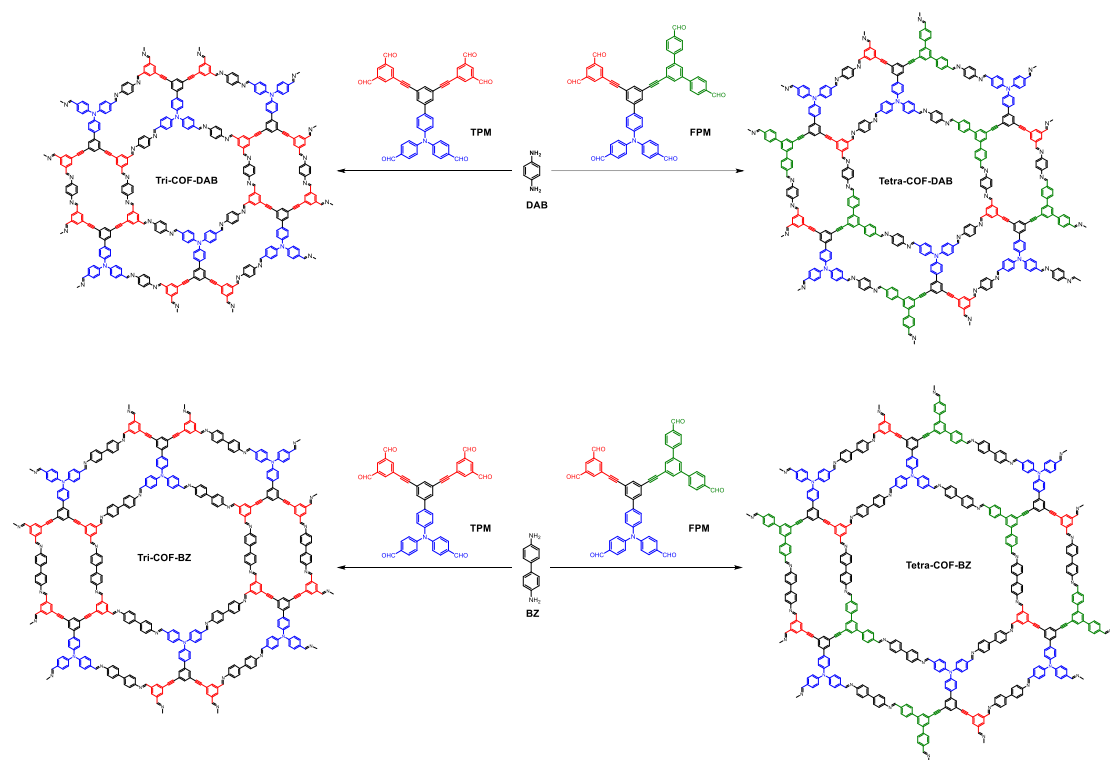

**Supplementary Figure 2.** Synthetic procedures of the COFs.

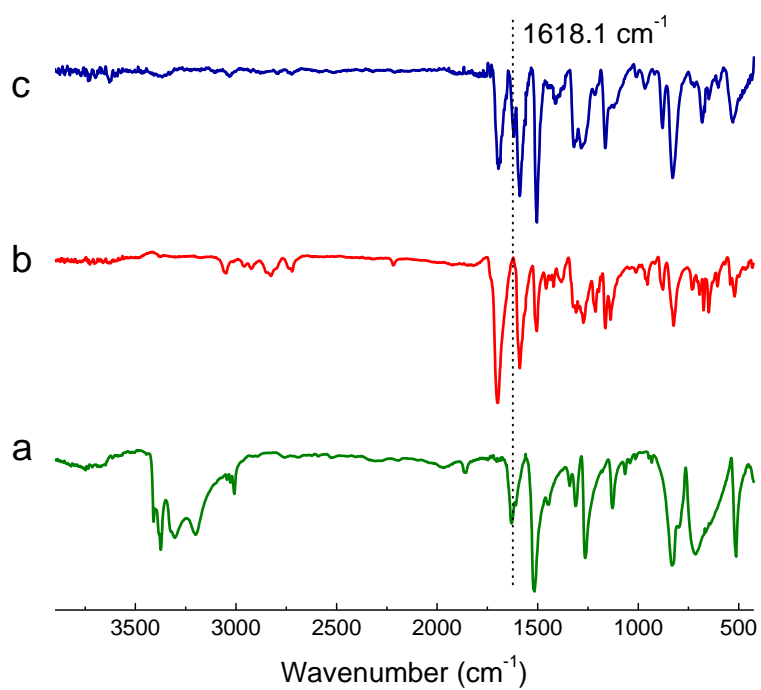

**Supplementary Figure 3.** FT-IR spectra of **a** DAB, **b** TPM, and **c** Tri-COF-DAB.

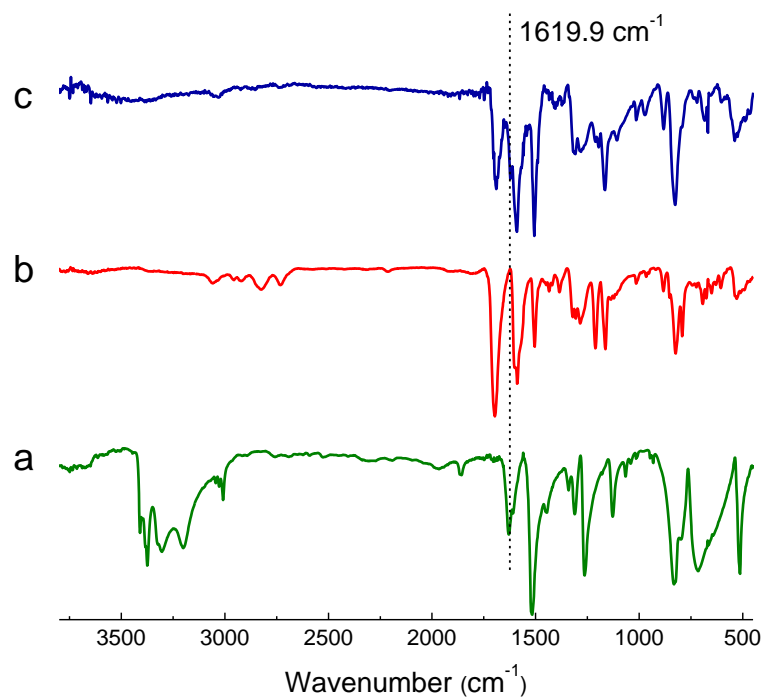

**Supplementary Figure 4.** FT-IR spectra of **a** DAB, **b** FPM, and **c** Tetra-COF-DAB.

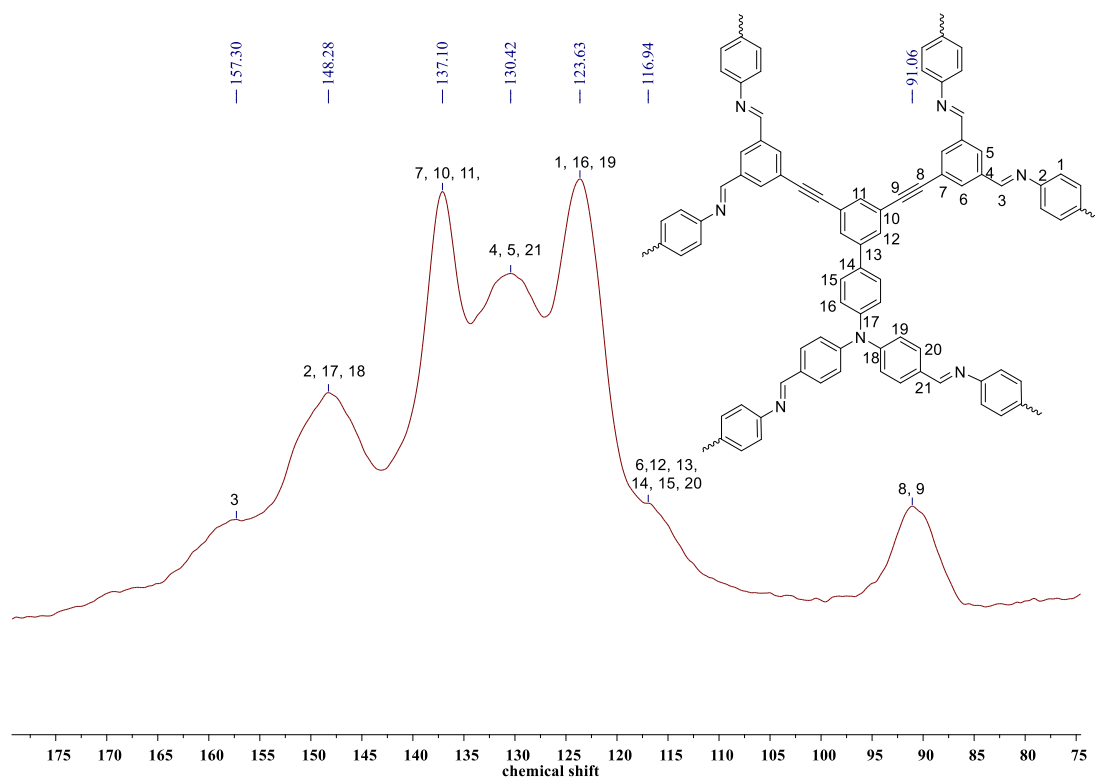

**Supplementary Figure 5.** Solid-state  $^{13}\text{C}$  CP/MAS NMR spectrum of Tri-COF-DAB.

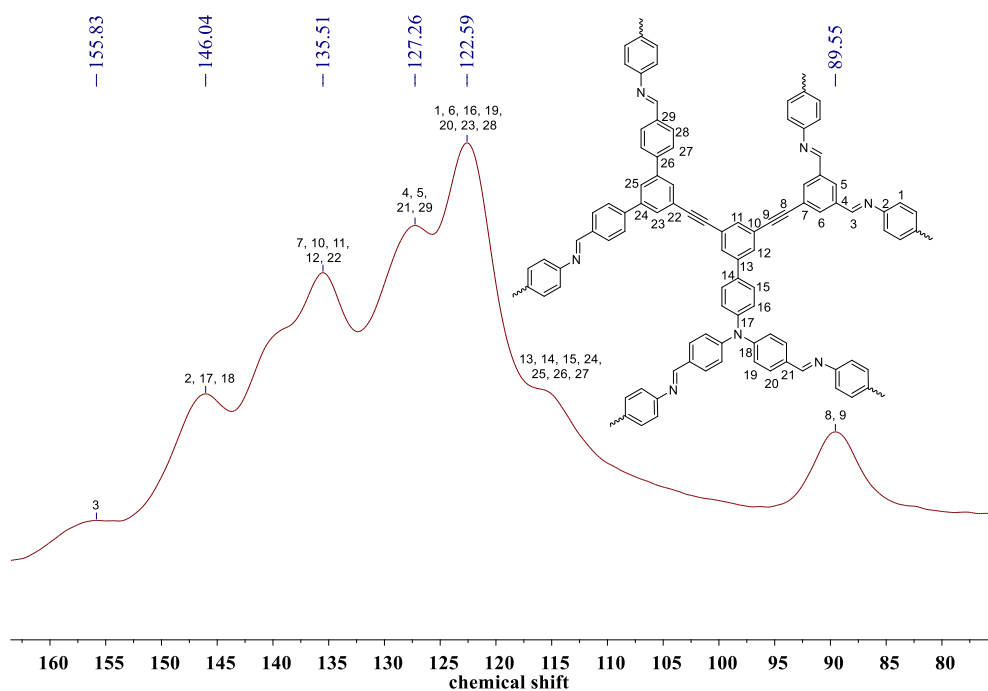

**Supplementary Figure 6.** Solid-state  $^{13}\text{C}$  CP/MAS NMR spectrum of Tetra-COF-DAB.

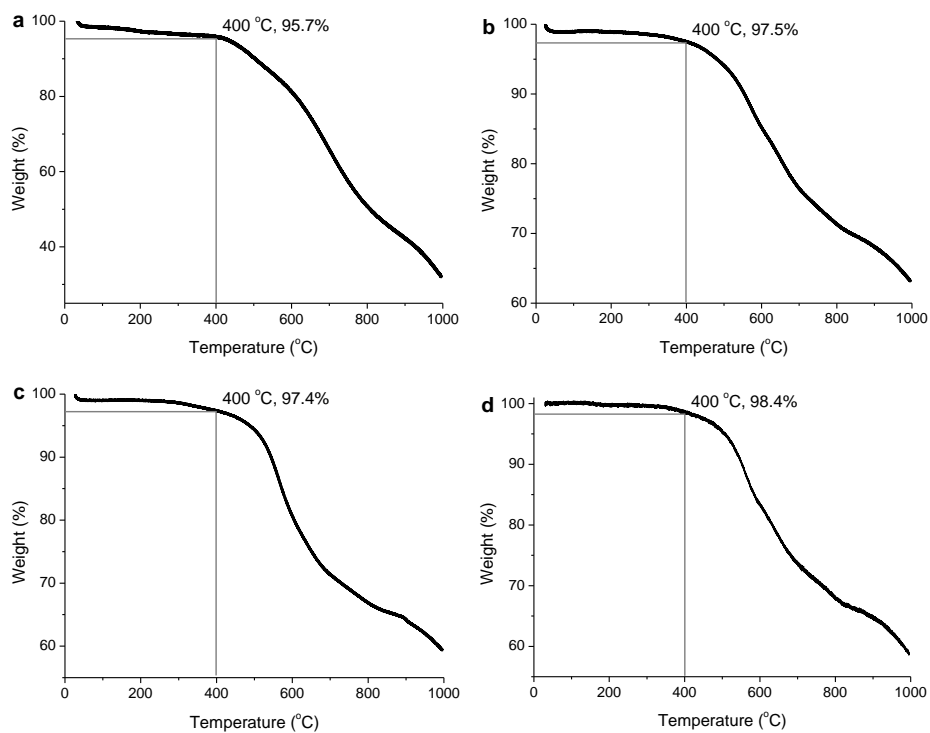

**Supplementary Figure 7.** TGA profiles of **a** Tri-COF-DAB, **b** Tetra-COF-DAB, **c** Tri-COF-BZ, and **d** Tetra-COF-BZ.

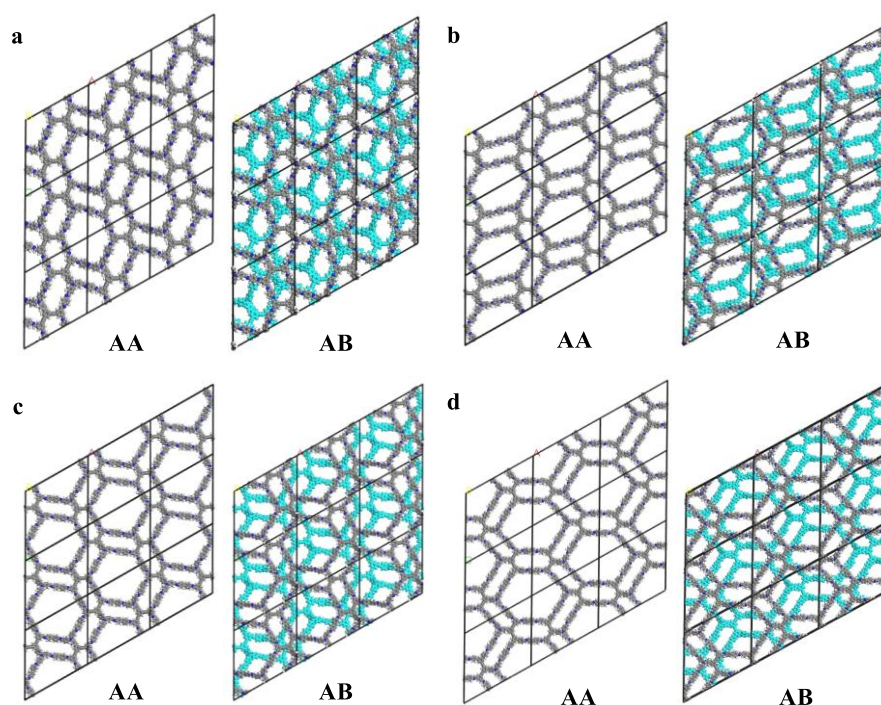

**Supplementary Figure 8.** Illustrations of AA and AB stacking models of **a** Tri-COF-DAB, **b** Tetra-COF-DAB, **c** Tri-COF-BZ and **d** Tetra-COF-BZ.

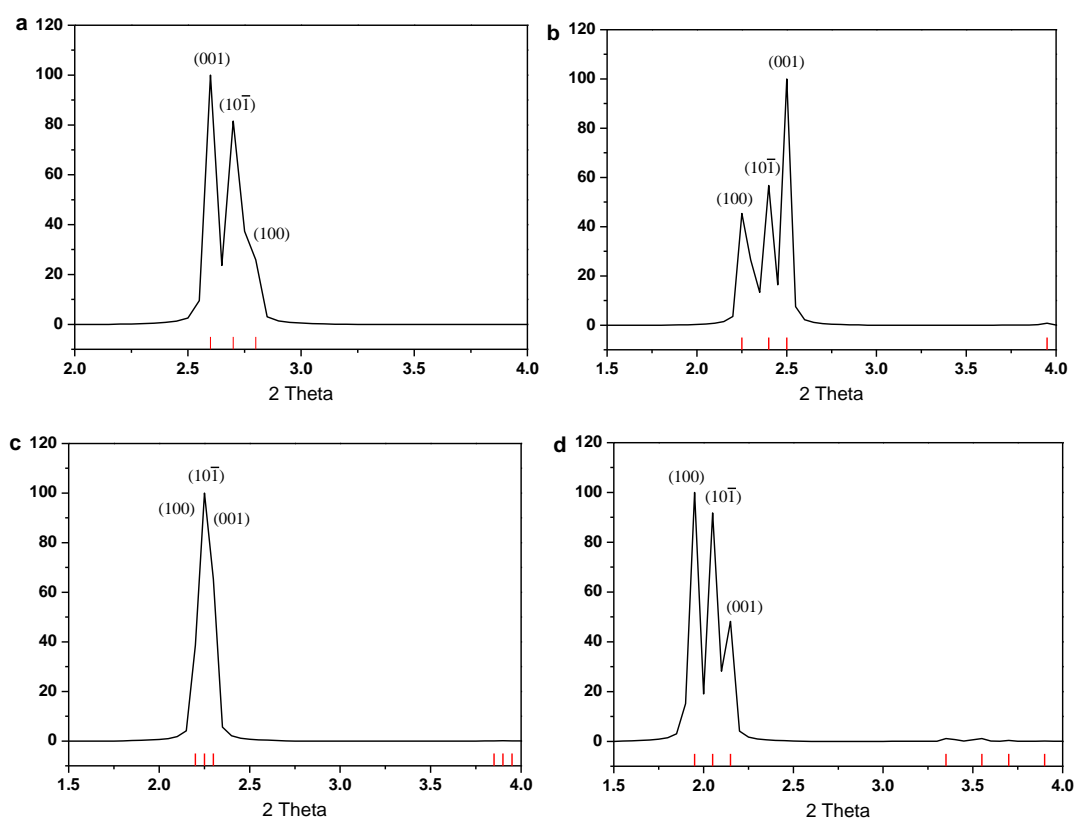

**Supplementary Figure 9.** The close-up views of the simulated PXRD patterns of **a** Tri-COF-DAB, **b** Tetra-COF-DAB, **c** Tri-COF-BZ, and **d** Tetra-COF-BZ with AA stacking models.

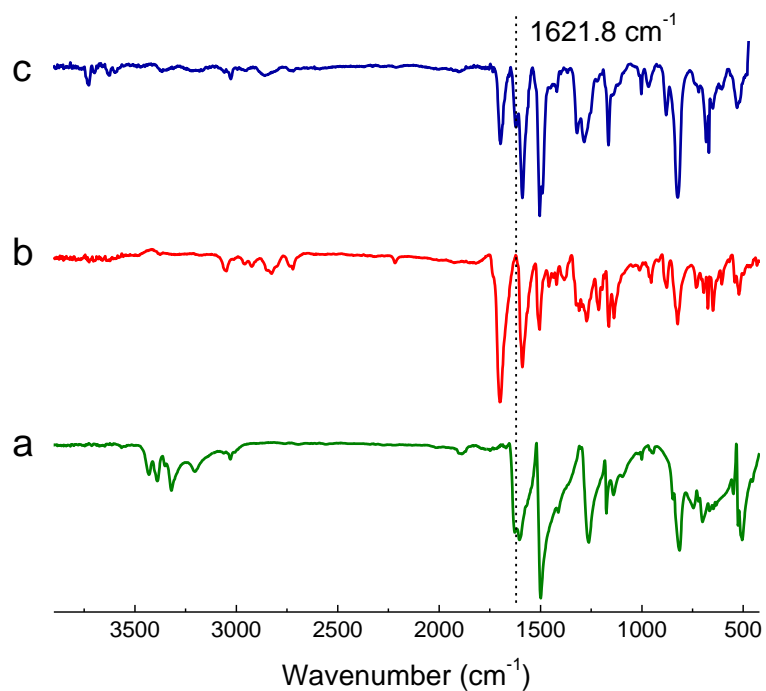

**Supplementary Figure 10.** FT-IR spectra of **a** BZ, **b** TPM, and **c** Tri-COF-BZ.

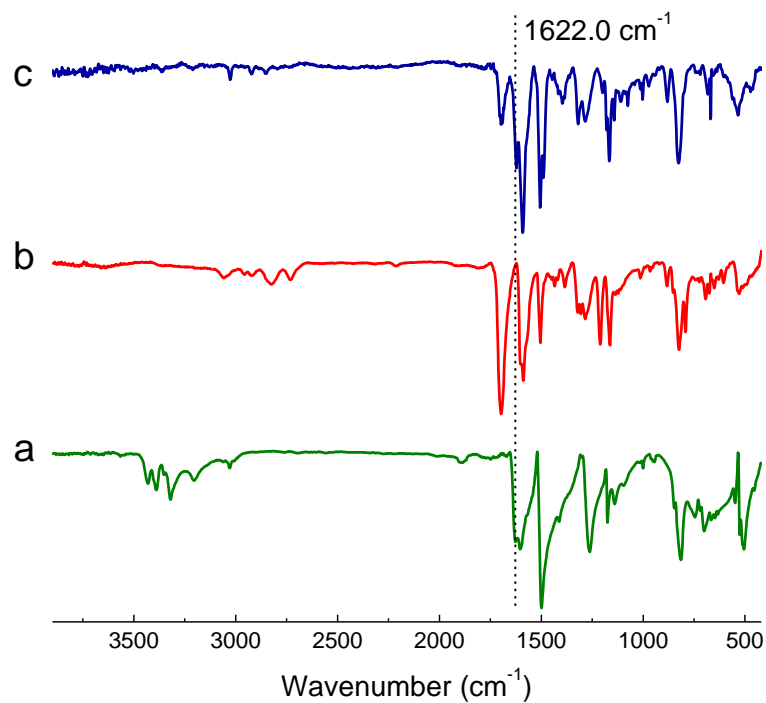

**Supplementary Figure 11.** FT-IR spectra of **a** BZ, **b** FPM, and **c** Tetra-COF-BZ.

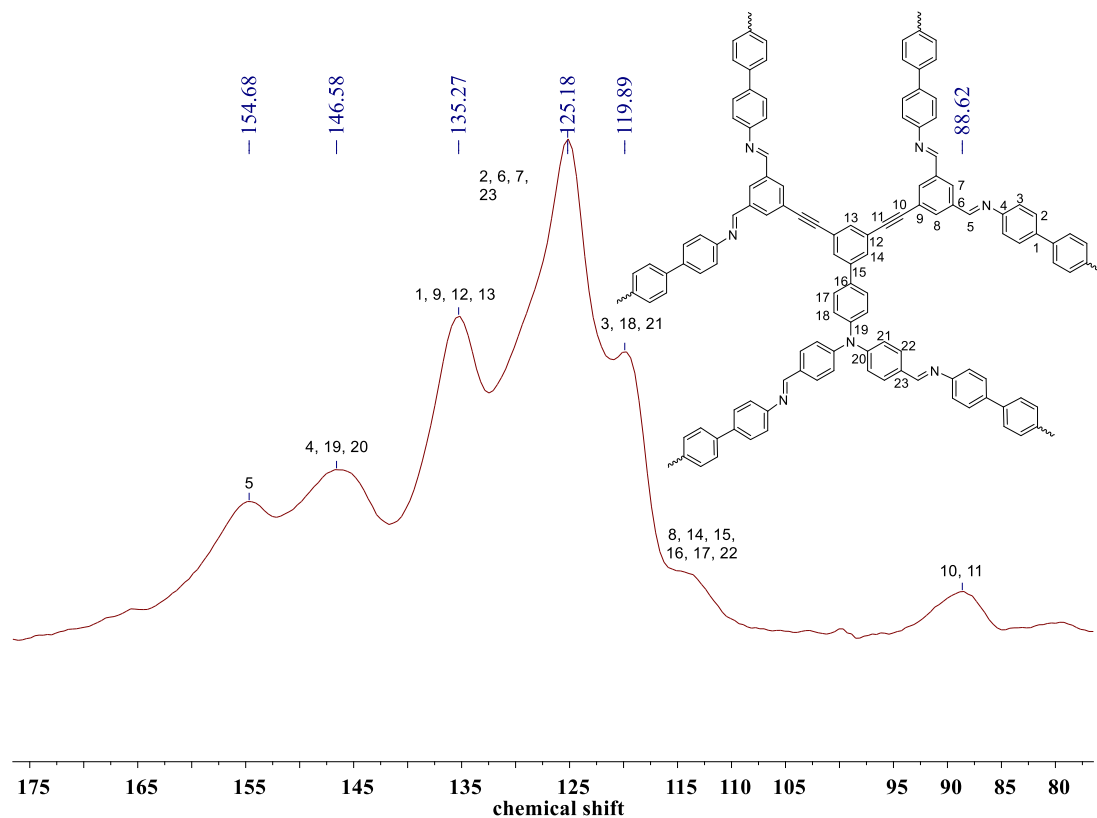

**Supplementary Figure 12.** Solid-state  $^{13}\text{C}$  CP/MAS NMR Spectrum of Tri-COF-BZ.

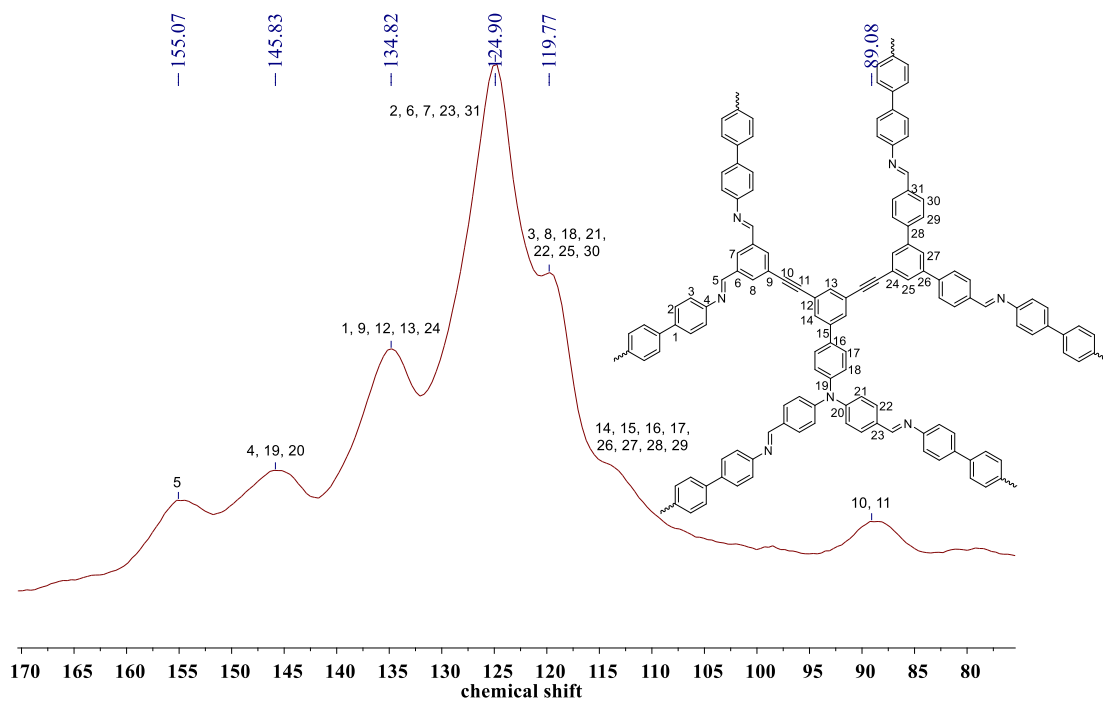

**Supplementary Figure 13.** Solid-state  $^{13}\text{C}$  CP/MAS NMR Spectrum of Tetra-COF-BZ.



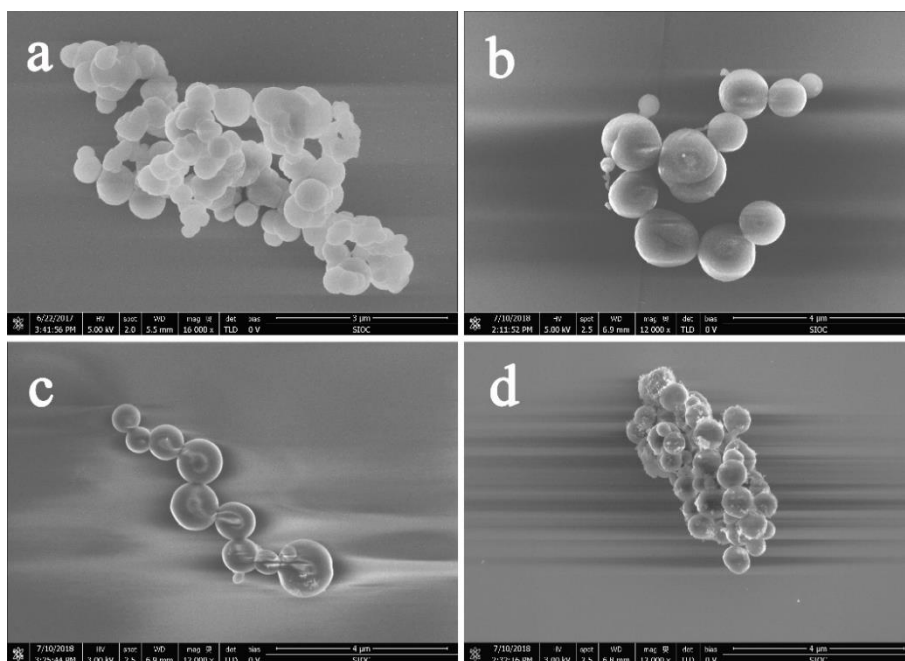

**Supplementary Figure 14.** SEM images of **a** Tri-COF-DAB, **b** Tetra-COF-DAB, **c** Tri-COF-BZ, and **d** Tetra-COF-BZ.

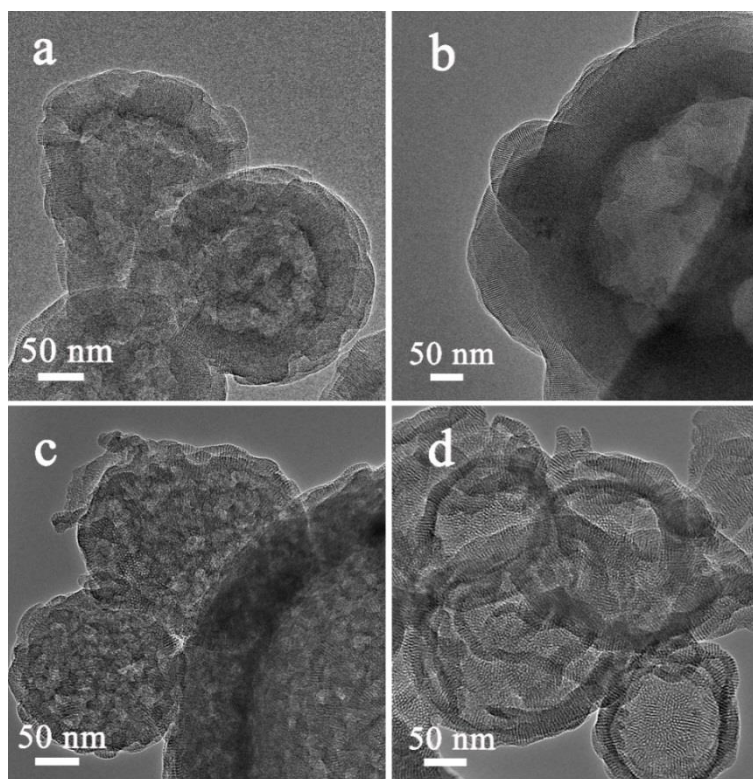

**Supplementary Figure 15.** TEM images of **a** Tri-COF-DAB, **b** Tetra-COF-DAB, **c** Tri-COF-BZ, and **d** Tetra-COF-BZ.

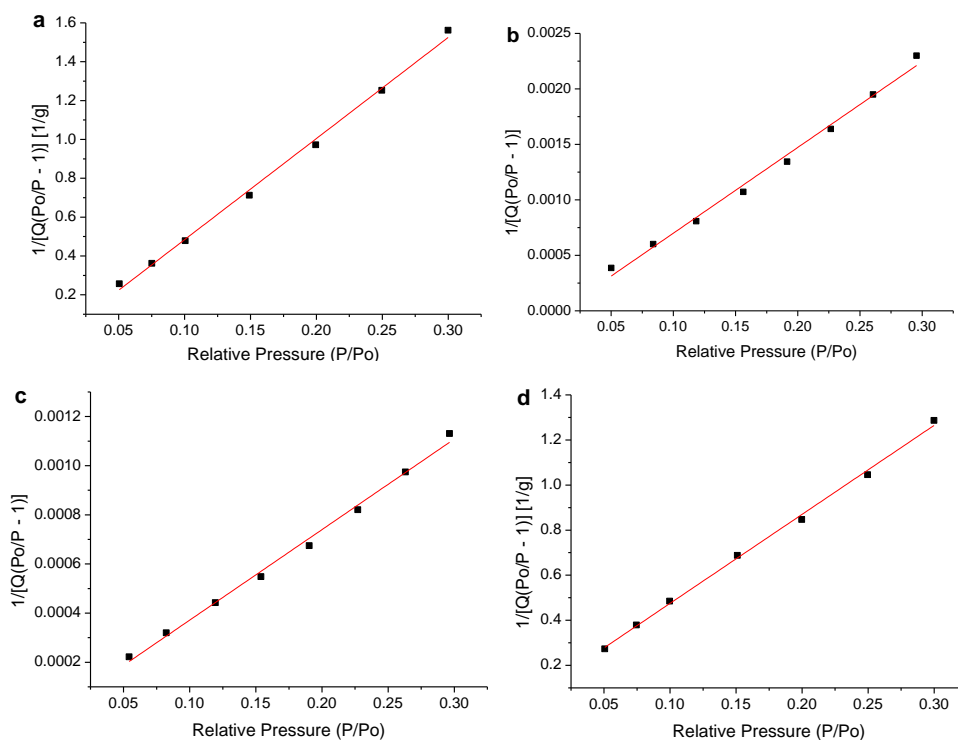

**Supplementary Figure 16.** BET surface area plots for **a** Tri-COF-DAB, **b** Tetra-COF-DAB, **c** Tri-COF-BZ, and **d** Tetra-COF-BZ.

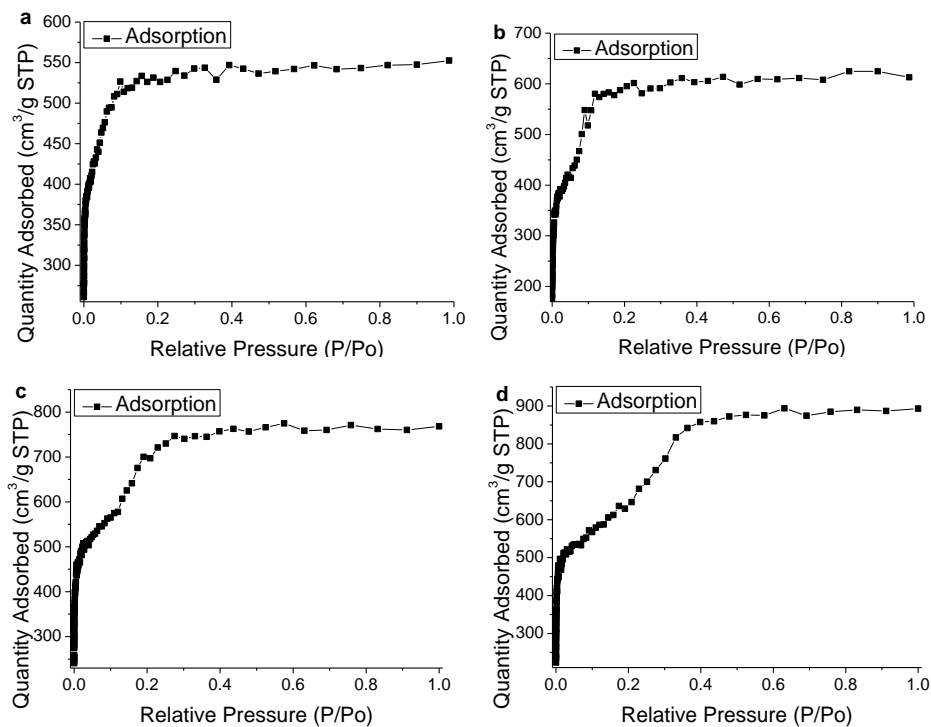

**Supplementary Figure 17.** Theoretical  $N_2$  adsorption isotherms (77 K) of **a** Tri-COF-DAB, **b** Tetra-COF-DAB, **c** Tri-COF-BZ and **d** Tetra-COF-BZ.

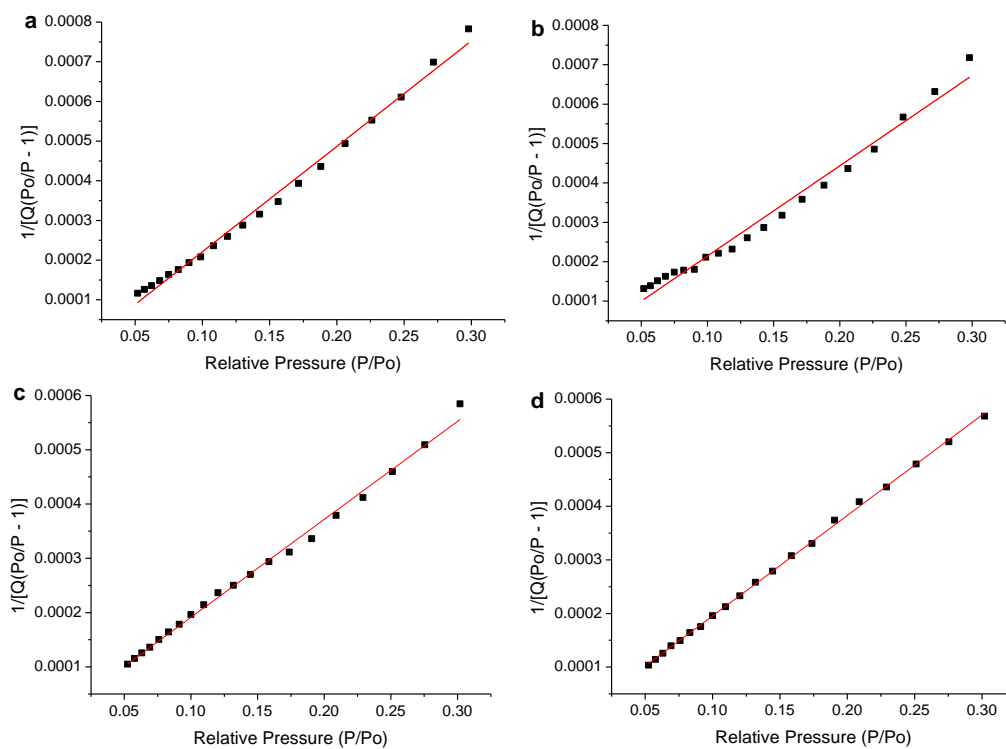

**Supplementary Figure 18.** Theoretical BET surface area plots for **a** Tri-COF-DAB, **b** Tetra-COF-DAB, **c** Tri-COF-BZ, and **d** Tetra-COF-BZ.

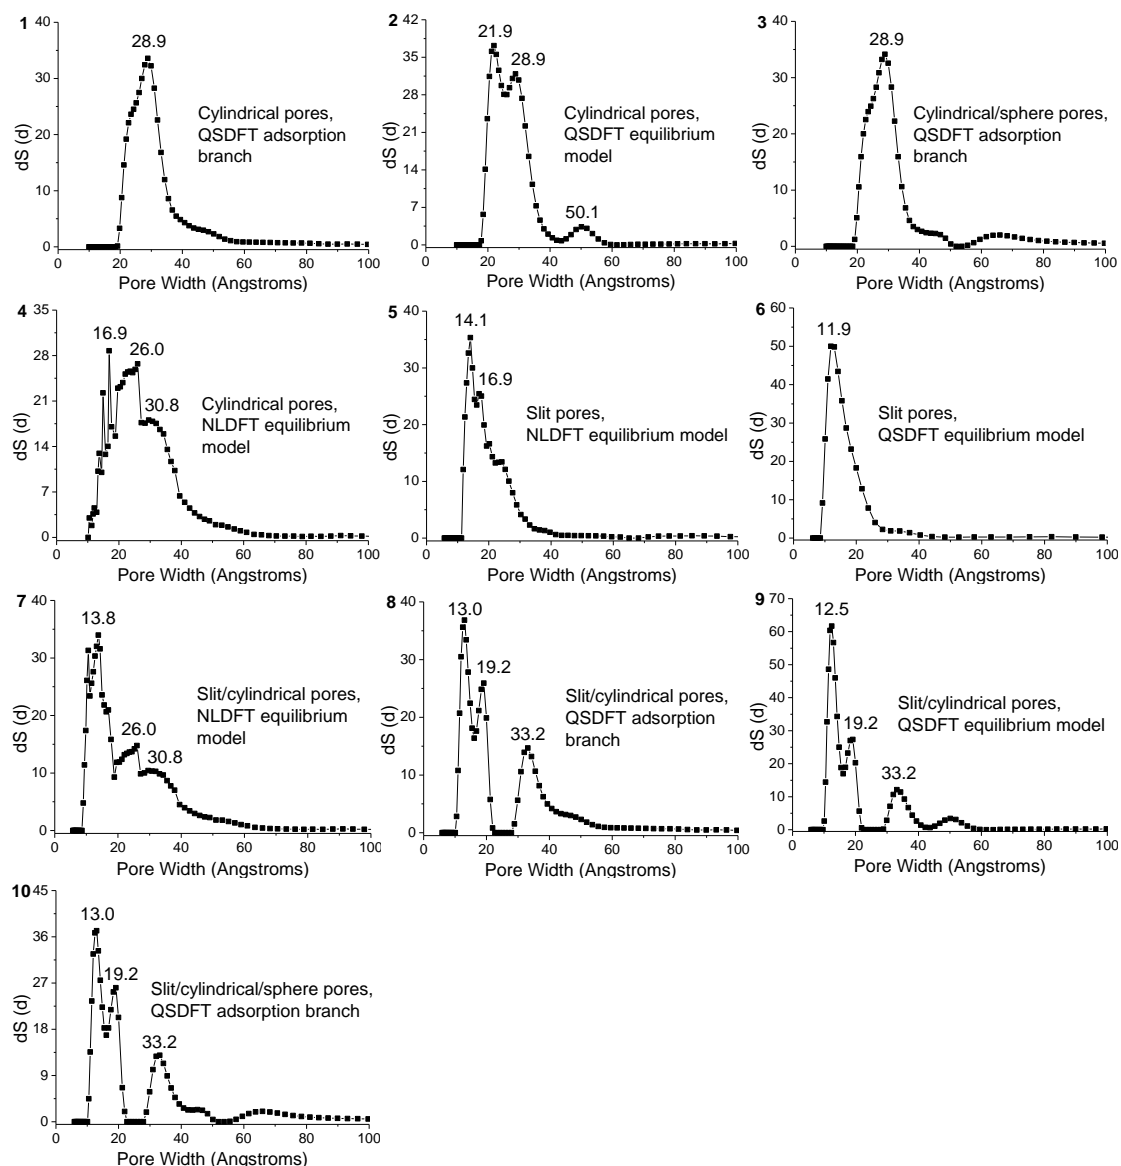

**Supplementary Figure 19.** (1-10) PSD profiles derived from different kernels/pore models, based on the nitrogen sorption isotherm of Tetra-COF-BZ at 77K.

**Supplementary Table 1.** Fractional atomic coordinates for the unit cell of Tri-COF-DAB with AA stacking.

| <i>P2</i>                                                                                                                                 |         |         |         |      |         |         |         |
|-------------------------------------------------------------------------------------------------------------------------------------------|---------|---------|---------|------|---------|---------|---------|
| $a = 36.79 \text{ \AA}$ , $b = 3.68 \text{ \AA}$ , and $c = 39.23 \text{ \AA}$ , and $\alpha = \gamma = 90^\circ$ and $\beta = 120^\circ$ |         |         |         |      |         |         |         |
| N7                                                                                                                                        | 0.29395 | 0.48327 | 0.9289  | C69  | 0.08934 | 0.29553 | 0.67482 |
| C15                                                                                                                                       | 0.68271 | 0.4924  | 1.0283  | N123 | 0.02728 | 0.43106 | 0.36913 |
| C16                                                                                                                                       | 0.63948 | 0.41275 | 1.00599 | N125 | 0.32605 | 0.61937 | 0.38393 |

|     |         |         |         |      |         |         |         |
|-----|---------|---------|---------|------|---------|---------|---------|
| C17 | 0.61839 | 0.42296 | 0.96468 | C131 | 0.64429 | 0.65346 | 0.70882 |
| C18 | 0.63951 | 0.50823 | 0.94424 | C132 | 0.61391 | 0.7359  | 0.66948 |
| C19 | 0.68282 | 0.58461 | 0.96636 | C133 | 0.62421 | 0.72839 | 0.63954 |
| C20 | 0.704   | 0.57505 | 1.00783 | C134 | 0.66485 | 0.63915 | 0.64795 |
| N21 | 0.61545 | 0.51705 | 0.90157 | C135 | 0.69582 | 0.57915 | 0.68767 |
| C22 | 0.62871 | 0.55795 | 0.87648 | C136 | 0.68551 | 0.58629 | 0.7176  |
| C23 | 0.59859 | 0.55747 | 0.83304 | H151 | 0.6217  | 0.33654 | 1.01996 |
| C24 | 0.55482 | 0.5412  | 0.81829 | H152 | 0.58519 | 0.36087 | 0.94837 |
| C25 | 0.5267  | 0.53458 | 0.7776  | H153 | 0.70044 | 0.65474 | 0.95204 |
| C26 | 0.54186 | 0.54097 | 0.75147 | H154 | 0.73724 | 0.63546 | 1.02417 |
| C27 | 0.58489 | 0.55878 | 0.76482 | H155 | 0.66184 | 0.58577 | 0.88668 |
| C28 | 0.61342 | 0.56996 | 0.80584 | H156 | 0.54255 | 0.53345 | 0.83828 |
| C29 | 0.2653  | 0.62356 | 0.59911 | H157 | 0.51961 | 0.53312 | 0.7201  |
| C30 | 0.24194 | 0.62592 | 0.55781 | H158 | 0.64682 | 0.58148 | 0.81653 |
| C31 | 0.25672 | 0.46473 | 0.53435 | H159 | 0.25208 | 0.7549  | 0.61513 |
| C32 | 0.29732 | 0.31092 | 0.55496 | H160 | 0.21186 | 0.75261 | 0.54459 |
| C33 | 0.3212  | 0.31319 | 0.59636 | H161 | 0.31093 | 0.18255 | 0.53944 |
| C34 | 0.30543 | 0.46669 | 0.6193  | H162 | 0.35161 | 0.18264 | 0.61033 |
| N35 | 0.2309  | 0.45251 | 0.49086 | H163 | 0.17767 | 0.22354 | 0.51895 |
| C36 | 0.25126 | 0.42716 | 0.46646 | H164 | 0.10215 | 0.18116 | 0.4837  |
| C37 | 0.18418 | 0.45102 | 0.47099 | H165 | 0.0983  | 0.63361 | 0.38093 |
| C38 | 0.16184 | 0.31527 | 0.48911 | H166 | 0.17152 | 0.65757 | 0.41394 |
| C39 | 0.11772 | 0.29246 | 0.46879 | H167 | 0.20195 | 0.1201  | 0.42009 |
| C40 | 0.09406 | 0.40233 | 0.42939 | H168 | 0.22729 | 0.12167 | 0.37539 |
| C41 | 0.11528 | 0.54582 | 0.41135 | H169 | 0.33615 | 0.71877 | 0.45913 |
| C42 | 0.15881 | 0.57033 | 0.43159 | H170 | 0.30859 | 0.72412 | 0.50457 |
| C43 | 0.23109 | 0.24828 | 0.42998 | H171 | 0.0318  | 0.25832 | 0.42162 |
| C44 | 0.24587 | 0.25309 | 0.4037  | H172 | 0.27654 | 0.26214 | 0.3564  |
| C45 | 0.28345 | 0.42462 | 0.41317 | H173 | 0.3912  | 0.50961 | 0.66703 |

|     |         |         |         |      |         |         |         |
|-----|---------|---------|---------|------|---------|---------|---------|
| C46 | 0.30657 | 0.58602 | 0.45062 | H174 | 0.39701 | 0.47736 | 0.7789  |
| C47 | 0.29053 | 0.58854 | 0.47685 | H175 | 0.27713 | 0.42842 | 0.6729  |
| C48 | 0.04776 | 0.35824 | 0.40669 | H176 | 0.1527  | 0.44503 | 0.79566 |
| C49 | 0.29544 | 0.42739 | 0.38216 | H177 | 0.57277 | 0.4808  | 0.70452 |
| C50 | 0.33066 | 0.46705 | 0.66374 | H178 | 0.08426 | 0.55017 | 0.75587 |
| C51 | 0.37496 | 0.48816 | 0.68356 | H179 | 0.00939 | 0.56651 | 0.70703 |
| C52 | 0.39868 | 0.48918 | 0.72491 | H180 | 0.03692 | 0.24092 | 0.6167  |
| C53 | 0.37856 | 0.47404 | 0.74701 | H181 | 0.11158 | 0.223   | 0.66552 |
| C54 | 0.33486 | 0.45595 | 0.72838 | H213 | 0.58222 | 0.80903 | 0.6617  |
| C55 | 0.31093 | 0.45    | 0.68689 | H214 | 0.60022 | 0.78757 | 0.60955 |
| C56 | 0.31539 | 0.44735 | 0.75265 | H215 | 0.72815 | 0.52894 | 0.69595 |
| C57 | 0.44394 | 0.50629 | 0.74503 | H216 | 0.70963 | 0.53235 | 0.74767 |
| C58 | 0.30009 | 0.44349 | 0.77378 | C8   | 0.30993 | 0.47694 | 0.90569 |
| C59 | 0.48179 | 0.51933 | 0.76124 | C9   | 0.28358 | 0.46071 | 0.86178 |
| C60 | 0.16897 | 0.41978 | 0.77922 | C10  | 0.23923 | 0.44716 | 0.84205 |
| N61 | 0.1484  | 0.38255 | 0.74106 | C11  | 0.21558 | 0.42936 | 0.80052 |
| C62 | 0.10379 | 0.38044 | 0.71441 | C12  | 0.23667 | 0.42605 | 0.77895 |
| C63 | 0.59704 | 0.55558 | 0.73392 | C13  | 0.28029 | 0.44121 | 0.7978  |
| N64 | 0.63421 | 0.63941 | 0.74008 | C14  | 0.30372 | 0.45808 | 0.8391  |
| C65 | 0.07444 | 0.47653 | 0.72583 | H147 | 0.34355 | 0.48917 | 0.91798 |
| C66 | 0.03156 | 0.48787 | 0.69785 | H148 | 0.22315 | 0.45018 | 0.85883 |
| C67 | 0.01711 | 0.40461 | 0.65819 | H149 | 0.21912 | 0.41455 | 0.74707 |
| C68 | 0.04649 | 0.30631 | 0.64687 | H150 | 0.33766 | 0.46978 | 0.85357 |

**Supplementary Table 2.** Fractional atomic coordinates for the unit cell of **Tetra-COF-DAB** with AA stacking.

|                                                                                                                                           |         |         |         |      |         |         |         |
|-------------------------------------------------------------------------------------------------------------------------------------------|---------|---------|---------|------|---------|---------|---------|
| <i>P2</i>                                                                                                                                 |         |         |         |      |         |         |         |
| $a = 44.94 \text{ \AA}$ , $b = 3.69 \text{ \AA}$ , and $c = 40.89 \text{ \AA}$ , and $\alpha = \gamma = 90^\circ$ and $\beta = 120^\circ$ |         |         |         |      |         |         |         |
| C54                                                                                                                                       | 0.12512 | 0.48422 | 0.99213 | H124 | 0.34123 | 0.79628 | 0.65787 |

|      |         |         |         |      |         |         |         |
|------|---------|---------|---------|------|---------|---------|---------|
| C55  | 0.14401 | 0.42554 | 0.9736  | H125 | 0.34471 | 0.24685 | 0.56704 |
| C56  | 0.12761 | 0.42935 | 0.93423 | H126 | 0.28392 | 0.19972 | 0.5338  |
| C57  | 0.09229 | 0.49346 | 0.91251 | H127 | 0.26055 | 0.74156 | 0.50487 |
| C58  | 0.07357 | 0.56573 | 0.93099 | H128 | 0.23407 | 0.72975 | 0.43794 |
| C59  | 0.09    | 0.56128 | 0.97046 | H129 | 0.14764 | 0.15915 | 0.43151 |
| H111 | 0.17144 | 0.38115 | 0.98911 | H130 | 0.17307 | 0.20135 | 0.49817 |
| H112 | 0.14249 | 0.38    | 0.92048 | N7   | 0.40258 | 0.50019 | 0.61704 |
| H113 | 0.04649 | 0.62882 | 0.91547 | N8   | 0.45357 | 0.51783 | 0.33119 |
| H114 | 0.07525 | 0.61583 | 0.98426 | C9   | 0.38592 | 0.57456 | 0.63471 |
| C32  | 0.9678  | 0.468   | 0.19341 | C10  | 0.43824 | 0.57454 | 0.35064 |
| C33  | 0.94471 | 0.45447 | 0.20711 | C11  | 0.40041 | 0.53667 | 0.33284 |
| C34  | 0.95659 | 0.43205 | 0.24604 | C12  | 0.38104 | 0.37916 | 0.29704 |
| C35  | 0.99235 | 0.42457 | 0.27155 | C13  | 0.34544 | 0.34616 | 0.28032 |
| C42  | 0.9557  | 0.48431 | 0.15255 | C14  | 0.32779 | 0.47968 | 0.29828 |
| C43  | 0.93068 | 0.41875 | 0.25845 | C15  | 0.34739 | 0.6314  | 0.33456 |
| N44  | 0.93918 | 0.3839  | 0.29375 | C16  | 0.38332 | 0.65701 | 0.35172 |
| C45  | 0.91544 | 0.36823 | 0.30786 | C17  | 0.17215 | 0.42664 | 0.38679 |
| N46  | 0.92308 | 0.48557 | 0.12791 | C18  | 0.14733 | 0.5202  | 0.61668 |
| C60  | 0.88016 | 0.28958 | 0.28467 | C19  | 0.19219 | 0.39876 | 0.36918 |
| C61  | 0.85812 | 0.28657 | 0.29972 | C20  | 0.17667 | 0.39084 | 0.32974 |
| C62  | 0.87057 | 0.36165 | 0.33798 | C21  | 0.14069 | 0.40055 | 0.30749 |
| C63  | 0.90612 | 0.42403 | 0.36143 | C22  | 0.1204  | 0.42376 | 0.32465 |
| C64  | 0.92811 | 0.42768 | 0.3464  | C23  | 0.13613 | 0.44212 | 0.36398 |
| H99  | 0.9173  | 0.45956 | 0.1874  | C24  | 0.19782 | 0.38362 | 0.31222 |
| H104 | 0.97468 | 0.48406 | 0.14369 | C25  | 0.08332 | 0.43011 | 0.30211 |
| H105 | 0.90398 | 0.44759 | 0.23695 | N26  | 0.15321 | 0.36344 | 0.64787 |
| H115 | 0.86939 | 0.22576 | 0.25511 | C27  | 0.05234 | 0.43446 | 0.2829  |
| H116 | 0.83112 | 0.22797 | 0.28138 | C28  | 0.21523 | 0.38605 | 0.29723 |
| H117 | 0.91733 | 0.46598 | 0.39145 | C29  | 0.01555 | 0.44035 | 0.25789 |

|      |         |         |         |      |         |         |         |
|------|---------|---------|---------|------|---------|---------|---------|
| H118 | 0.95522 | 0.48028 | 0.36489 | C30  | 0.23476 | 0.39934 | 0.27783 |
| C1   | 0.48999 | 0.53351 | 0.34498 | C31  | 0.00313 | 0.46155 | 0.21905 |
| C2   | 0.51456 | 0.49304 | 0.38344 | C36  | 0.27085 | 0.42961 | 0.29792 |
| C3   | 0.54964 | 0.48803 | 0.39518 | C37  | 0.28927 | 0.46383 | 0.27841 |
| C4   | 0.56104 | 0.5244  | 0.3691  | C38  | 0.27053 | 0.47724 | 0.23874 |
| C5   | 0.53652 | 0.56479 | 0.3306  | C39  | 0.23488 | 0.42137 | 0.21835 |
| C6   | 0.50136 | 0.56728 | 0.3188  | C40  | 0.2171  | 0.38671 | 0.23828 |
| C65  | 0.20478 | 0.35632 | 0.62208 | C41  | 0.21699 | 0.38997 | 0.17641 |
| C66  | 0.22609 | 0.3472  | 0.60586 | C47  | 0.23402 | 0.23019 | 0.15905 |
| C67  | 0.21509 | 0.48793 | 0.56929 | C48  | 0.21839 | 0.21061 | 0.11988 |
| C68  | 0.18169 | 0.63605 | 0.55032 | C49  | 0.18519 | 0.34652 | 0.09691 |
| C69  | 0.16052 | 0.6438  | 0.56608 | C50  | 0.16756 | 0.49892 | 0.1139  |
| C70  | 0.17159 | 0.5045  | 0.60203 | C51  | 0.18335 | 0.52072 | 0.15333 |
| N71  | 0.23661 | 0.47624 | 0.55125 | C52  | 0.17009 | 0.32718 | 0.05557 |
| C72  | 0.22009 | 0.46847 | 0.50949 | N53  | 0.14081 | 0.47843 | 0.03262 |
| C73  | 0.27454 | 0.47872 | 0.5743  | H88  | 0.39912 | 0.68099 | 0.66315 |
| C74  | 0.29245 | 0.64232 | 0.61038 | H89  | 0.45275 | 0.66008 | 0.37983 |
| C75  | 0.32858 | 0.66341 | 0.63062 | H90  | 0.39344 | 0.2754  | 0.28208 |
| C76  | 0.34802 | 0.52947 | 0.61505 | H91  | 0.33187 | 0.21037 | 0.25331 |
| C77  | 0.33072 | 0.35879 | 0.57989 | H92  | 0.33503 | 0.74058 | 0.34931 |
| C78  | 0.29506 | 0.32832 | 0.56058 | H93  | 0.39769 | 0.77956 | 0.3794  |
| C79  | 0.23588 | 0.61881 | 0.49016 | H94  | 0.12386 | 0.6719  | 0.60015 |
| C80  | 0.22073 | 0.60439 | 0.45088 | H95  | 0.21991 | 0.38121 | 0.386   |
| C81  | 0.1886  | 0.44113 | 0.42875 | H96  | 0.12856 | 0.39217 | 0.27697 |
| C82  | 0.17222 | 0.29384 | 0.44722 | H97  | 0.12009 | 0.47304 | 0.37663 |
| C83  | 0.18763 | 0.30844 | 0.48649 | H98  | 0.02113 | 0.47219 | 0.20872 |
| H84  | 0.50689 | 0.45426 | 0.40438 | H101 | 0.28432 | 0.42258 | 0.32847 |
| H85  | 0.56813 | 0.45092 | 0.42484 | H102 | 0.28379 | 0.53307 | 0.22335 |
| H86  | 0.54416 | 0.58596 | 0.30947 | H103 | 0.18953 | 0.34612 | 0.22318 |



|      |         |         |         |      |         |         |         |
|------|---------|---------|---------|------|---------|---------|---------|
| H87  | 0.4828  | 0.59296 | 0.28902 | H106 | 0.25942 | 0.11483 | 0.17573 |
| H119 | 0.21417 | 0.24515 | 0.65004 | H107 | 0.23232 | 0.08751 | 0.10747 |
| H120 | 0.25107 | 0.2291  | 0.62233 | H108 | 0.14188 | 0.60643 | 0.09678 |
| H121 | 0.17057 | 0.73511 | 0.52228 | H109 | 0.16961 | 0.64965 | 0.16561 |
| H122 | 0.135   | 0.75831 | 0.54968 | H110 | 0.18423 | 0.18095 | 0.04479 |
| H123 | 0.27894 | 0.76082 | 0.6231  | H100 | 1.00207 | 0.40772 | 0.30166 |

**Supplementary Table 3.** Fractional atomic coordinates for the unit cell of **Tri-COF-BZ** with AA stacking.

|                                                                                                                                           |         |         |         |      |         |         |         |
|-------------------------------------------------------------------------------------------------------------------------------------------|---------|---------|---------|------|---------|---------|---------|
| <i>P</i> 2                                                                                                                                |         |         |         |      |         |         |         |
| $a = 45.95 \text{ \AA}$ , $b = 3.85 \text{ \AA}$ , and $c = 44.59 \text{ \AA}$ , and $\alpha = \gamma = 90^\circ$ and $\beta = 120^\circ$ |         |         |         |      |         |         |         |
| C2                                                                                                                                        | 0.16552 | 0.47069 | 0.01532 | N77  | 0.26732 | 0.51114 | 0.49669 |
| C3                                                                                                                                        | 0.18531 | 0.4565  | 0.05139 | C78  | 0.30409 | 0.51147 | 0.51216 |
| C4                                                                                                                                        | 0.17199 | 0.33086 | 0.07148 | C79  | 0.24558 | 0.50826 | 0.45883 |
| C5                                                                                                                                        | 0.13877 | 0.20448 | 0.05472 | C80  | 0.21365 | 0.34991 | 0.44279 |
| C6                                                                                                                                        | 0.11896 | 0.21966 | 0.01869 | C81  | 0.1926  | 0.3526  | 0.40691 |
| N7                                                                                                                                        | 0.19282 | 0.3379  | 0.10857 | C82  | 0.20282 | 0.51183 | 0.38546 |
| C8                                                                                                                                        | 0.18186 | 0.32627 | 0.13036 | C83  | 0.23469 | 0.66663 | 0.40086 |
| C9                                                                                                                                        | 0.20502 | 0.34664 | 0.16809 | C84  | 0.25555 | 0.66514 | 0.43682 |
| C10                                                                                                                                       | 0.24016 | 0.35894 | 0.18251 | C85  | 0.3199  | 0.35339 | 0.4955  |
| C11                                                                                                                                       | 0.2614  | 0.39019 | 0.2185  | C86  | 0.35488 | 0.34208 | 0.51082 |
| C12                                                                                                                                       | 0.24718 | 0.407   | 0.24    | C87  | 0.3754  | 0.48614 | 0.54359 |
| C13                                                                                                                                       | 0.21237 | 0.39297 | 0.22581 | C88  | 0.36025 | 0.65099 | 0.56029 |
| C14                                                                                                                                       | 0.1914  | 0.36225 | 0.19005 | C89  | 0.32529 | 0.66637 | 0.54462 |
| C24                                                                                                                                       | 0.00056 | 0.59379 | 0.22105 | H125 | 0.46959 | 0.75121 | 0.3075  |
| C25                                                                                                                                       | 0.02283 | 0.63441 | 0.25658 | H126 | 0.531   | 0.76926 | 0.3437  |
| C26                                                                                                                                       | 0.01044 | 0.68398 | 0.27922 | H127 | 0.52339 | 0.34856 | 0.42928 |
| C29                                                                                                                                       | 0.41229 | 0.4564  | 0.56009 | H128 | 0.46276 | 0.32459 | 0.39323 |
| C30                                                                                                                                       | 0.21005 | 0.54336 | 0.58659 | H129 | 0.18204 | 0.7892  | 0.52013 |

|      |         |         |         |      |          |         |          |
|------|---------|---------|---------|------|----------|---------|----------|
| C31  | 0.18035 | 0.516   | 0.34725 | H130 | 0.20588  | 0.77129 | 0.48296  |
| C32  | 0.14541 | 0.55897 | 0.33267 | H131 | 0.29322  | 0.24926 | 0.56284  |
| C33  | 0.12423 | 0.55843 | 0.29668 | H132 | 0.26924  | 0.26636 | 0.60002  |
| C34  | 0.13775 | 0.51962 | 0.27491 | H133 | 0.20425  | 0.22951 | 0.4578   |
| C35  | 0.17242 | 0.47913 | 0.28909 | H134 | 0.16846  | 0.22417 | 0.39598  |
| C36  | 0.19361 | 0.4753  | 0.32506 | H135 | 0.24333  | 0.79619 | 0.3852   |
| C37  | 0.18635 | 0.44422 | 0.26671 | H136 | 0.27969  | 0.78402 | 0.44706  |
| C38  | 0.08848 | 0.59117 | 0.28211 | H137 | 0.30551  | 0.24009 | 0.47038  |
| C39  | 0.19814 | 0.41873 | 0.24801 | H138 | 0.36591  | 0.21496 | 0.4972   |
| C40  | 0.05853 | 0.61353 | 0.27019 | H139 | 0.37535  | 0.76805 | 0.58556  |
| C41  | 0.29823 | 0.40827 | 0.23338 | H140 | 0.31516  | 0.79143 | 0.55878  |
| N42  | 0.31762 | 0.46613 | 0.26629 | C1   | 0.13198  | 0.35665 | -0.00137 |
| N45  | 0.43173 | 0.5745  | 0.59121 | C15  | 0.11044  | 0.38752 | -0.03947 |
| N46  | 0.17911 | 0.63629 | 0.57533 | C16  | 0.07717  | 0.50651 | -0.05411 |
| C59  | 0.42433 | 0.52328 | 0.32582 | C17  | 0.05714  | 0.54504 | -0.08994 |
| C61  | 0.40401 | 0.6296  | 0.33939 | C18  | 0.06991  | 0.46844 | -0.11182 |
| C62  | 0.36906 | 0.61146 | 0.31923 | C19  | 0.10296  | 0.34063 | -0.09733 |
| C63  | 0.35364 | 0.48883 | 0.28516 | C20  | 0.12304  | 0.30239 | -0.06147 |
| C64  | 0.37388 | 0.38221 | 0.27137 | H98  | 0.06686  | 0.57668 | -0.03778 |
| C65  | 0.40892 | 0.40091 | 0.29155 | H99  | 0.0317   | 0.64108 | -0.1007  |
| H90  | 0.17615 | 0.58026 | 0.00055 | H100 | 0.11326  | 0.26457 | -0.11346 |
| H91  | 0.21087 | 0.55261 | 0.06384 | H101 | 0.14829  | 0.20183 | -0.05094 |
| H92  | 0.128   | 0.0906  | 0.06912 | N21  | -0.04844 | 0.51754 | 0.14845  |
| H93  | 0.09348 | 0.1214  | 0.00644 | C22  | -0.05857 | 0.55644 | 0.17073  |
| H94  | 0.15517 | 0.31991 | 0.1212  | C23  | -0.03434 | 0.60203 | 0.20798  |
| H95  | 0.25099 | 0.34754 | 0.16582 | C27  | -0.02427 | 0.69029 | 0.26664  |
| H96  | 0.26308 | 0.43229 | 0.26781 | C28  | -0.04653 | 0.65042 | 0.23093  |
| H97  | 0.16438 | 0.35449 | 0.17927 | C43  | -0.03672 | 0.72843 | 0.29122  |
| H103 | 0.01046 | 0.5531  | 0.20378 | N44  | -0.06856 | 0.69842 | 0.28072  |

|      |         |         |         |      |          |         |         |
|------|---------|---------|---------|------|----------|---------|---------|
| H104 | 0.02785 | 0.71212 | 0.30674 | C47  | -0.0839  | 0.71717 | 0.30192 |
| H106 | 0.42252 | 0.325   | 0.54601 | C48  | -0.06749 | 0.85916 | 0.33552 |
| H107 | 0.22588 | 0.46403 | 0.61329 | C49  | -0.08333 | 0.86107 | 0.35533 |
| H108 | 0.13464 | 0.5955  | 0.34921 | C50  | -0.11581 | 0.72324 | 0.34198 |
| H109 | 0.12135 | 0.52029 | 0.24704 | C51  | -0.13236 | 0.58937 | 0.30813 |
| H110 | 0.22035 | 0.43646 | 0.33566 | C52  | -0.11656 | 0.58847 | 0.28833 |
| H111 | 0.30849 | 0.38016 | 0.21635 | H102 | -0.08512 | 0.56544 | 0.16225 |
| H121 | 0.41516 | 0.72955 | 0.36553 | H105 | -0.07341 | 0.65463 | 0.22092 |
| H122 | 0.35383 | 0.69392 | 0.3302  | H112 | -0.01859 | 0.76348 | 0.31838 |
| H123 | 0.36303 | 0.27745 | 0.24551 | H113 | -0.04277 | 0.9734  | 0.34648 |
| H124 | 0.42402 | 0.31162 | 0.28067 | H114 | -0.07031 | 0.97449 | 0.38098 |
| C60  | 0.46145 | 0.53571 | 0.34756 | H115 | -0.1572  | 0.47682 | 0.29727 |
| C66  | 0.48122 | 0.65921 | 0.33396 | H116 | -0.12953 | 0.47923 | 0.2625  |
| C67  | 0.5162  | 0.67136 | 0.3546  | C53  | -0.16385 | 0.66473 | 0.4035  |
| C68  | 0.53217 | 0.55854 | 0.38906 | C54  | -0.13221 | 0.713   | 0.36339 |
| C69  | 0.51237 | 0.43594 | 0.40282 | C55  | -0.18247 | 0.7576  | 0.36835 |
| C70  | 0.47738 | 0.4248  | 0.3822  | C56  | -0.16676 | 0.7815  | 0.34851 |
| C71  | 0.20644 | 0.66979 | 0.52966 | C57  | -0.11359 | 0.62803 | 0.39875 |
| C72  | 0.22055 | 0.66337 | 0.50827 | C58  | -0.12928 | 0.6074  | 0.41863 |
| C73  | 0.2523  | 0.513   | 0.51911 | H117 | -0.20898 | 0.81699 | 0.35632 |
| C74  | 0.26899 | 0.3661  | 0.5526  | H118 | -0.18159 | 0.85667 | 0.32158 |
| C75  | 0.25527 | 0.3779  | 0.57434 | H119 | -0.08702 | 0.57031 | 0.41089 |
| C76  | 0.22387 | 0.52959 | 0.56306 | H120 | -0.11461 | 0.53884 | 0.44576 |

**Supplementary Table 4.** Fractional atomic coordinates for the unit cell of **Tetra-COF-BZ** with AA stacking.

|                                                                                                                                           |         |         |         |     |         |         |         |
|-------------------------------------------------------------------------------------------------------------------------------------------|---------|---------|---------|-----|---------|---------|---------|
| <i>P2</i>                                                                                                                                 |         |         |         |     |         |         |         |
| $a = 52.50 \text{ \AA}$ , $b = 3.85 \text{ \AA}$ , and $c = 47.86 \text{ \AA}$ , and $\alpha = \gamma = 90^\circ$ and $\beta = 120^\circ$ |         |         |         |     |         |         |         |
| C1                                                                                                                                        | 0.39711 | 0.38977 | 0.38327 | C81 | 0.12101 | 0.42475 | 0.42406 |

|     |         |         |         |      |         |         |         |
|-----|---------|---------|---------|------|---------|---------|---------|
| C2  | 0.58334 | 0.36438 | 0.63082 | C82  | 0.13217 | 0.58061 | 0.45456 |
| C3  | 0.5539  | 0.47638 | 0.61339 | C83  | 0.16257 | 0.5935  | 0.47606 |
| C4  | 0.53609 | 0.46864 | 0.62748 | C84  | 0.08906 | 0.40697 | 0.40065 |
| C5  | 0.54751 | 0.35576 | 0.65933 | N85  | 0.06989 | 0.5486  | 0.4068  |
| C6  | 0.57655 | 0.23131 | 0.67638 | C86  | 0.03837 | 0.55015 | 0.38606 |
| C7  | 0.59423 | 0.23515 | 0.66225 | C87  | 0.02424 | 0.44497 | 0.35346 |
| C8  | 0.36745 | 0.48653 | 0.36385 | C88  | 0.9935  | 0.4485  | 0.33466 |
| C9  | 0.34893 | 0.50978 | 0.37689 | C89  | 0.97621 | 0.55691 | 0.3479  |
| C10 | 0.35971 | 0.44479 | 0.40964 | C90  | 0.99038 | 0.66737 | 0.38022 |
| C11 | 0.3893  | 0.34622 | 0.42921 | C91  | 0.02108 | 0.66514 | 0.39895 |
| C12 | 0.4078  | 0.31876 | 0.41611 | C92  | 0.10379 | 0.42056 | 0.6762  |
| N13 | 0.52946 | 0.37236 | 0.67402 | C93  | 0.07308 | 0.42508 | 0.65817 |
| N14 | 0.33981 | 0.46621 | 0.42193 | C94  | 0.05646 | 0.5502  | 0.67166 |
| C15 | 0.53989 | 0.45157 | 0.7042  | C95  | 0.07131 | 0.66613 | 0.70384 |
| C16 | 0.52115 | 0.46064 | 0.71906 | C96  | 0.10212 | 0.66285 | 0.72188 |
| C17 | 0.34728 | 0.5515  | 0.4513  | C97  | 0.3009  | 0.56969 | 0.89628 |
| C18 | 0.3254  | 0.55372 | 0.46209 | C98  | 0.32145 | 0.56694 | 0.9294  |
| C19 | 0.29744 | 0.40425 | 0.44336 | C99  | 0.35068 | 0.46177 | 0.94065 |
| C20 | 0.27766 | 0.39287 | 0.45487 | C100 | 0.35882 | 0.35686 | 0.91811 |
| C21 | 0.28523 | 0.53513 | 0.48515 | C101 | 0.33835 | 0.35945 | 0.88515 |
| C22 | 0.31296 | 0.6941  | 0.50331 | H102 | 0.54488 | 0.58012 | 0.58925 |
| C23 | 0.33289 | 0.69984 | 0.49204 | H103 | 0.5137  | 0.56302 | 0.61398 |
| C24 | 0.49286 | 0.31671 | 0.70409 | H104 | 0.58552 | 0.12968 | 0.70059 |
| C25 | 0.47651 | 0.3151  | 0.71995 | H105 | 0.61646 | 0.136   | 0.67594 |
| C26 | 0.48761 | 0.4619  | 0.751   | H106 | 0.3586  | 0.54863 | 0.3386  |
| C27 | 0.51579 | 0.61388 | 0.76493 | H107 | 0.32616 | 0.58381 | 0.36151 |
| C28 | 0.53237 | 0.60953 | 0.74956 | H108 | 0.39795 | 0.28228 | 0.45438 |
| N29 | 0.47092 | 0.45397 | 0.76825 | H109 | 0.43031 | 0.23582 | 0.43155 |
| C30 | 0.48675 | 0.45001 | 0.80382 | H110 | 0.56279 | 0.52537 | 0.71895 |

|     |         |         |         |      |         |         |         |
|-----|---------|---------|---------|------|---------|---------|---------|
| C31 | 0.43858 | 0.45379 | 0.74993 | H111 | 0.36965 | 0.63048 | 0.46815 |
| C32 | 0.42278 | 0.61532 | 0.7195  | H112 | 0.29117 | 0.2863  | 0.42027 |
| C33 | 0.39206 | 0.6082  | 0.70159 | H113 | 0.25687 | 0.26128 | 0.44048 |
| C34 | 0.37573 | 0.44224 | 0.71362 | H114 | 0.31932 | 0.81637 | 0.52624 |
| C35 | 0.39111 | 0.28498 | 0.74413 | H115 | 0.35419 | 0.82046 | 0.5067  |
| C36 | 0.42188 | 0.2903  | 0.76181 | H116 | 0.48359 | 0.19874 | 0.68045 |
| C37 | 0.47492 | 0.60225 | 0.82173 | H117 | 0.45507 | 0.20098 | 0.70741 |
| C38 | 0.49098 | 0.61752 | 0.85553 | H118 | 0.52597 | 0.72543 | 0.78845 |
| C39 | 0.51954 | 0.48214 | 0.87264 | H119 | 0.55416 | 0.72337 | 0.76168 |
| C40 | 0.53121 | 0.31977 | 0.85535 | H120 | 0.434   | 0.74483 | 0.70902 |
| C41 | 0.515   | 0.30145 | 0.82177 | H121 | 0.38112 | 0.74038 | 0.67855 |
| C42 | 0.34292 | 0.43549 | 0.69454 | H122 | 0.37943 | 0.14956 | 0.75415 |
| C43 | 0.53714 | 0.51843 | 0.90816 | H123 | 0.43241 | 0.16706 | 0.78494 |
| C44 | 0.32799 | 0.40998 | 0.66059 | H124 | 0.45323 | 0.71043 | 0.80996 |
| C45 | 0.29715 | 0.41199 | 0.64267 | H125 | 0.48126 | 0.74205 | 0.86827 |
| C46 | 0.28093 | 0.43385 | 0.65851 | H126 | 0.5531  | 0.20901 | 0.86771 |
| C47 | 0.2954  | 0.45652 | 0.69216 | H127 | 0.52559 | 0.18456 | 0.81009 |
| C48 | 0.3262  | 0.45939 | 0.71008 | H128 | 0.52702 | 0.63827 | 0.92063 |
| C49 | 0.28216 | 0.40652 | 0.60791 | H129 | 0.34025 | 0.38777 | 0.64799 |
| C50 | 0.27853 | 0.47964 | 0.70827 | H130 | 0.25709 | 0.43627 | 0.64467 |
| N51 | 0.56445 | 0.41726 | 0.92368 | H131 | 0.33703 | 0.48627 | 0.73607 |
| C52 | 0.58496 | 0.4382  | 0.95779 | H132 | 0.55559 | 0.66165 | 0.97282 |
| C53 | 0.26433 | 0.49726 | 0.7217  | H133 | 0.59217 | 0.68177 | 0.02987 |
| C54 | 0.27021 | 0.41202 | 0.57884 | H135 | 0.6199  | 0.21985 | 0.95209 |
| C55 | 0.2475  | 0.51595 | 0.73789 | H136 | 0.20594 | 0.53711 | 0.69393 |
| C56 | 0.25745 | 0.43161 | 0.54431 | H137 | 0.20228 | 0.55324 | 0.782   |
| C57 | 0.57744 | 0.56792 | 0.98024 | H138 | 0.28568 | 0.49629 | 0.78489 |
| C58 | 0.59844 | 0.57809 | 0.01313 | H139 | 0.29973 | 0.45102 | 0.54795 |
| C59 | 0.62731 | 0.45995 | 0.02431 | H140 | 0.22518 | 0.55699 | 0.45231 |

|     |         |         |         |      |         |         |         |
|-----|---------|---------|---------|------|---------|---------|---------|
| C60 | 0.63477 | 0.33333 | 1.00182 | H141 | 0.21264 | 0.39389 | 0.53373 |
| C61 | 0.61376 | 0.32215 | 0.96898 | H142 | 0.15869 | 0.58026 | 0.68944 |
| C62 | 0.21686 | 0.53497 | 0.72006 | H143 | 0.24909 | 0.55006 | 0.83591 |
| C63 | 0.20022 | 0.54763 | 0.73563 | H144 | 0.18557 | 0.17119 | 0.42999 |
| C64 | 0.21485 | 0.54344 | 0.76967 | H145 | 0.13278 | 0.15569 | 0.39246 |
| C65 | 0.24581 | 0.52489 | 0.7878  | H146 | 0.11747 | 0.69546 | 0.46169 |
| C66 | 0.26187 | 0.51095 | 0.77151 | H147 | 0.1705  | 0.72248 | 0.49904 |
| C67 | 0.2762  | 0.46286 | 0.53163 | H148 | 0.08208 | 0.26764 | 0.37837 |
| C68 | 0.26489 | 0.50513 | 0.49834 | H149 | 0.03655 | 0.36079 | 0.34216 |
| C69 | 0.23418 | 0.51117 | 0.47785 | H150 | 0.9832  | 0.36002 | 0.3099  |
| C70 | 0.2149  | 0.4652  | 0.49007 | H151 | 0.97768 | 0.75838 | 0.39094 |
| C71 | 0.2269  | 0.42882 | 0.52365 | H152 | 0.03149 | 0.75169 | 0.42378 |
| C72 | 0.18246 | 0.45054 | 0.46756 | H153 | 0.11564 | 0.31202 | 0.66518 |
| C73 | 0.16778 | 0.56022 | 0.71527 | H154 | 0.06226 | 0.32439 | 0.63378 |
| C74 | 0.26147 | 0.5196  | 0.82356 | H155 | 0.05911 | 0.76555 | 0.71485 |
| N75 | 0.28981 | 0.47305 | 0.83955 | H156 | 0.11314 | 0.75719 | 0.74649 |
| C76 | 0.3093  | 0.46484 | 0.87387 | H157 | 0.27885 | 0.65983 | 0.88848 |
| N77 | 0.15039 | 0.55041 | 0.7273  | H158 | 0.31466 | 0.65391 | 0.94621 |
| C78 | 0.1187  | 0.54623 | 0.70815 | H159 | 0.381   | 0.26906 | 0.92601 |
| C79 | 0.17108 | 0.29242 | 0.4371  | H160 | 0.34515 | 0.27837 | 0.8682  |
| C80 | 0.14079 | 0.28067 | 0.41565 | H134 | 0.65668 | 0.23569 | 1.00971 |

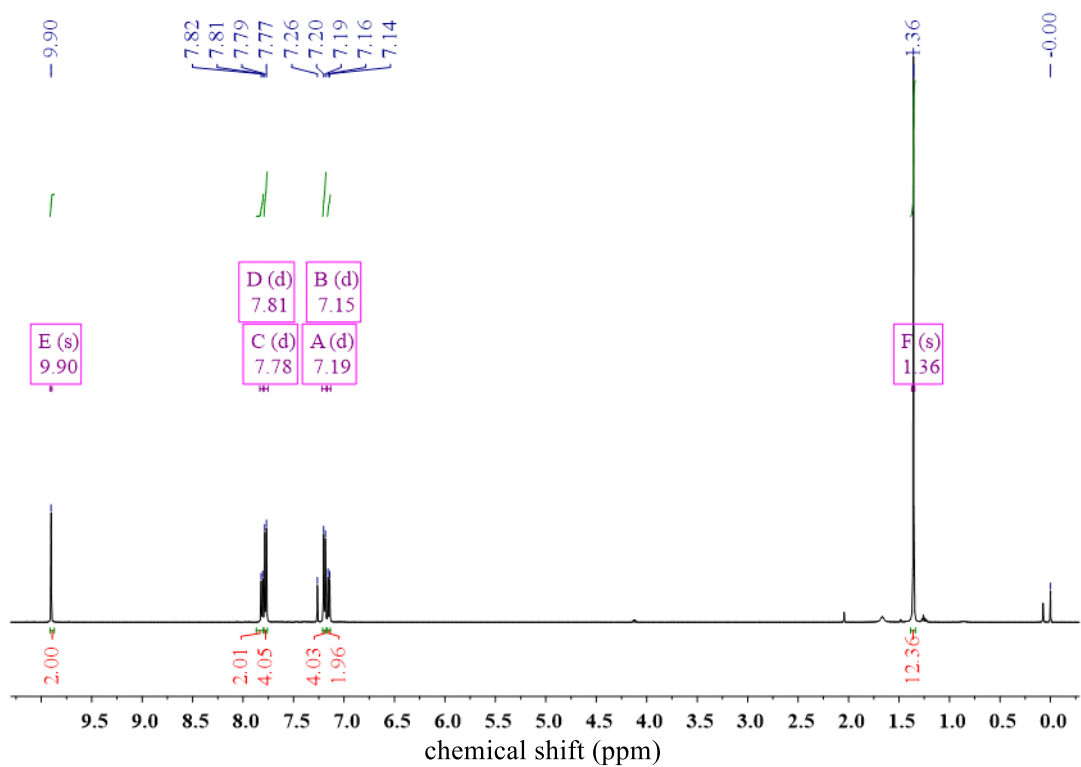

Supplementary Figure 20.  $^1\text{H}$  NMR (500 MHz,  $\text{CDCl}_3$ ) spectrum of 1c.

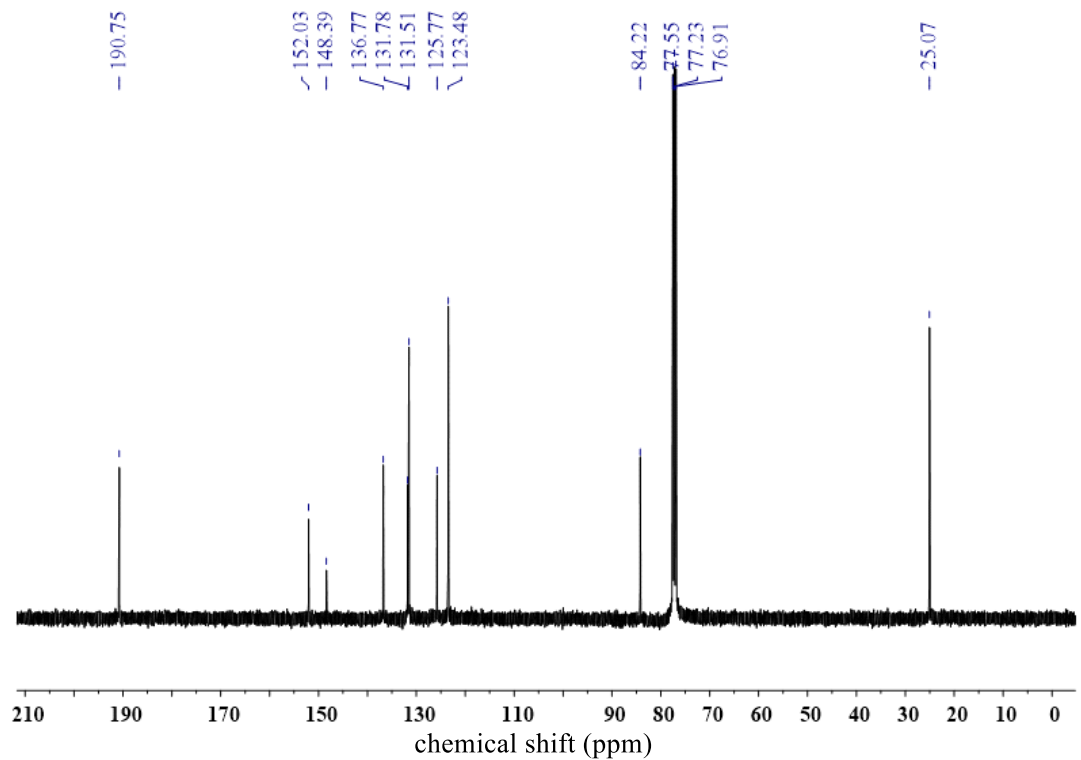

Supplementary Figure 21.  $^{13}\text{C}$  NMR (101 MHz,  $\text{CDCl}_3$ ) spectrum of 1c.

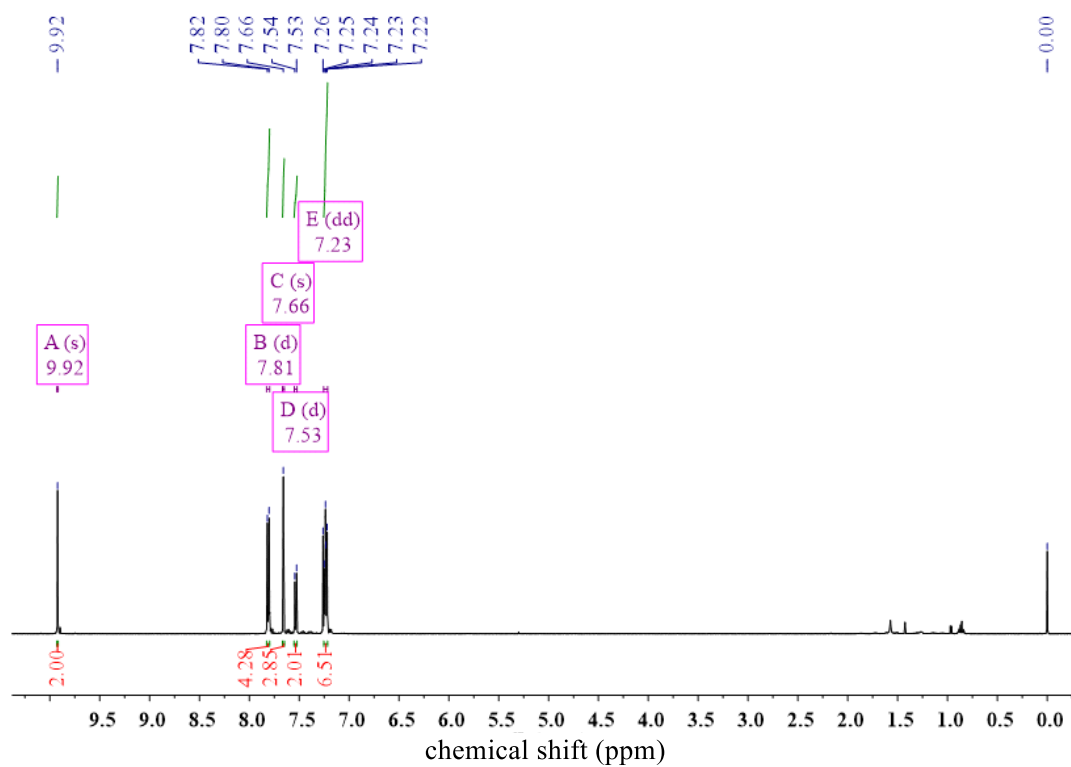

Supplementary Figure 22.  $^1\text{H}$  NMR (500 MHz,  $\text{CDCl}_3$ ) spectrum of 1d.

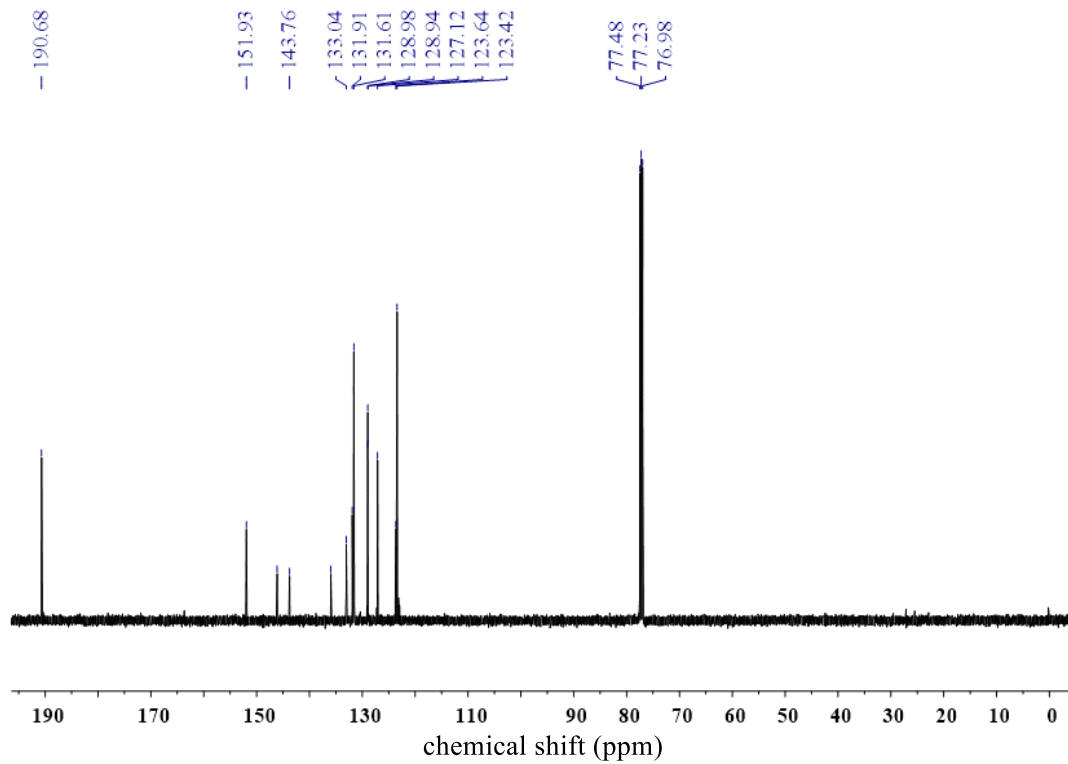

Supplementary Figure 23.  $^{13}\text{C}$  NMR (126 MHz,  $\text{CDCl}_3$ ) spectrum of 1d.



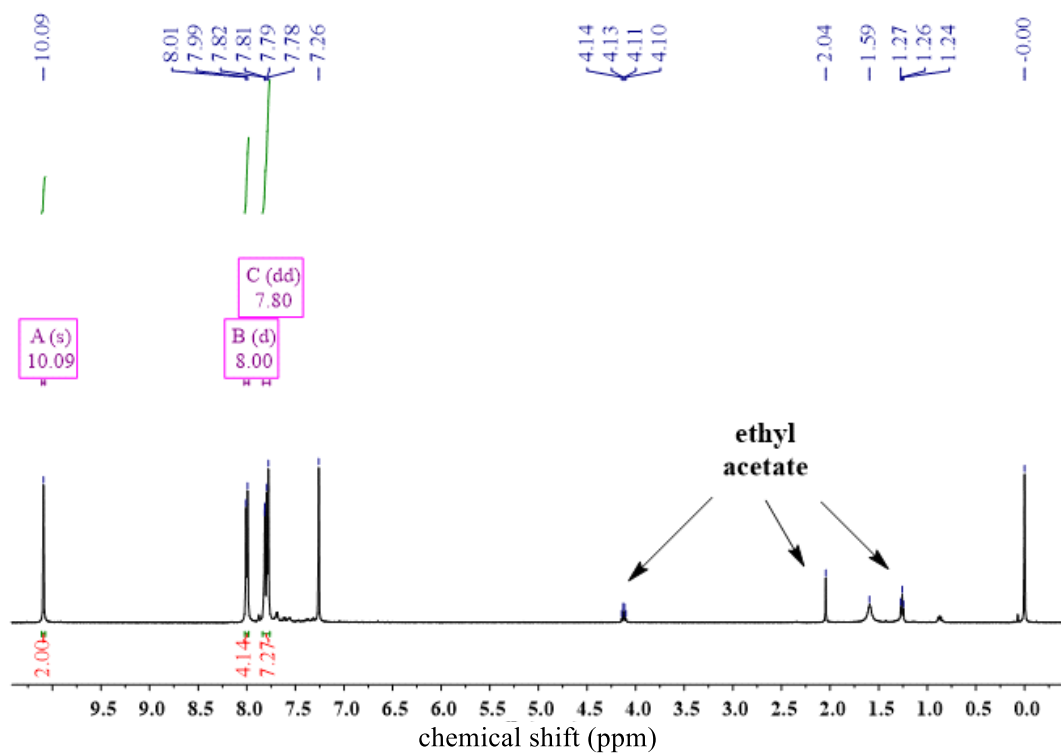

Supplementary Figure 24.  $^1\text{H}$  NMR (500 MHz,  $\text{CDCl}_3$ ) spectrum of 2b.

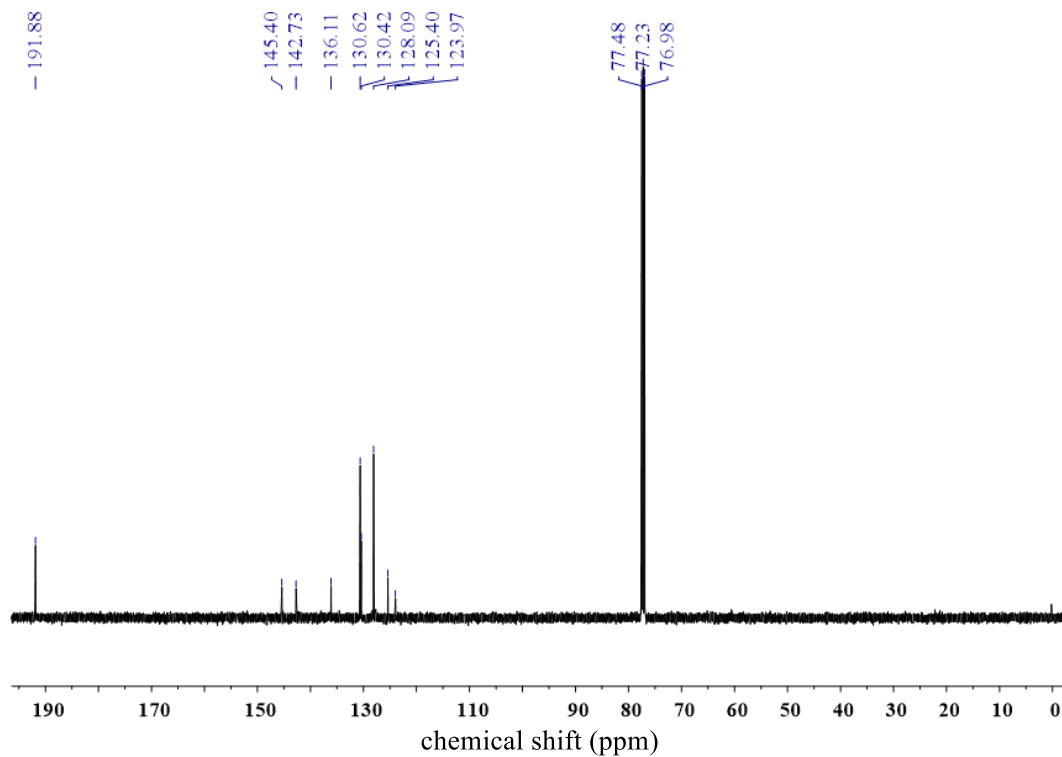

Supplementary Figure 25.  $^{13}\text{C}$  NMR (126 MHz,  $\text{CDCl}_3$ ) spectrum of 2b.

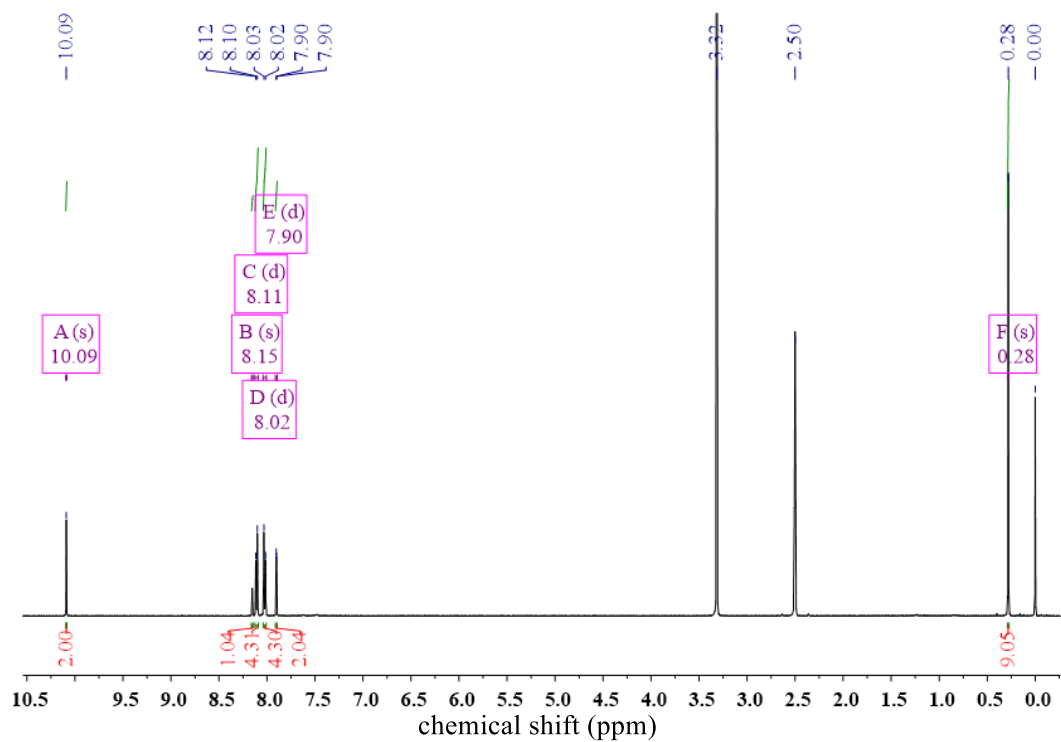

Supplementary Figure 26.  $^1\text{H}$  NMR (500 MHz,  $\text{DMSO-}d_6$ ) spectrum of 2c.

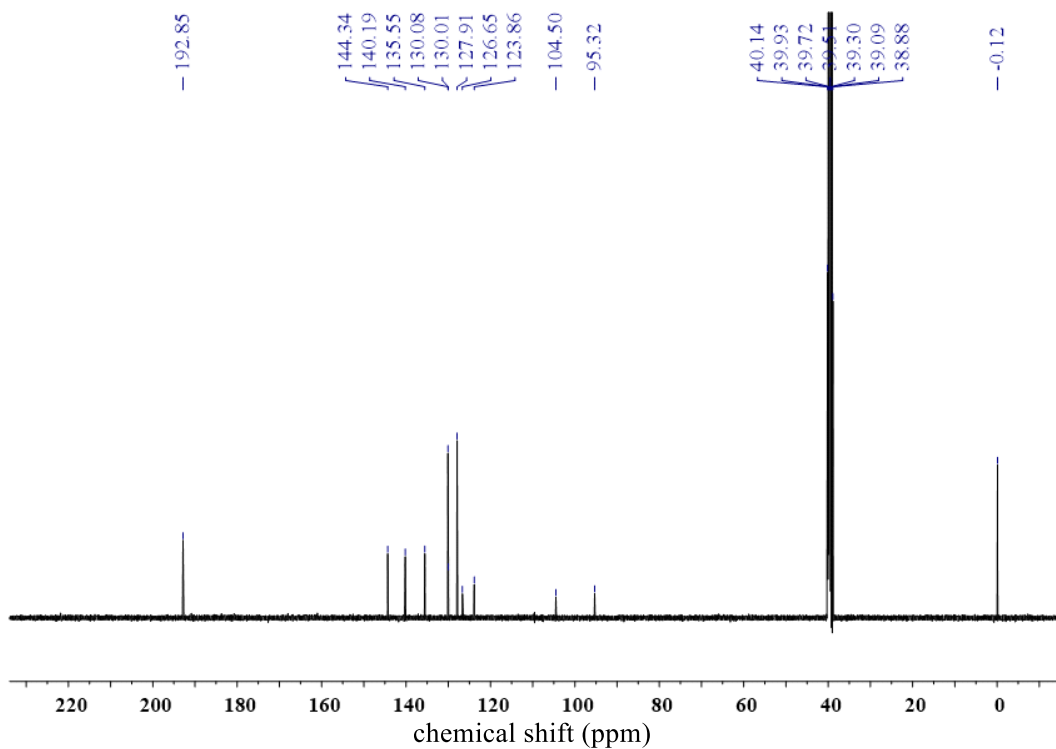

Supplementary Figure 27.  $^{13}\text{C}$  NMR (101 MHz,  $\text{DMSO-}d_6$ ) spectrum of 2c.

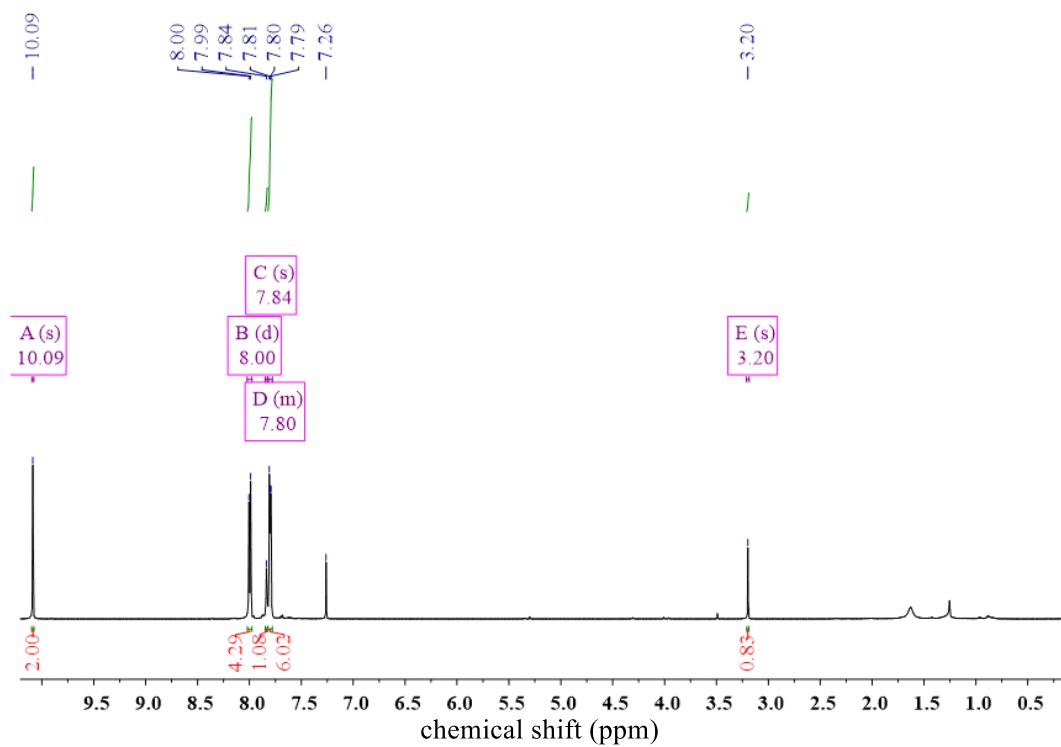

**Supplementary Figure 28.**  $^1\text{H}$  NMR (500 MHz,  $\text{CDCl}_3$ ) spectrum of 2d.

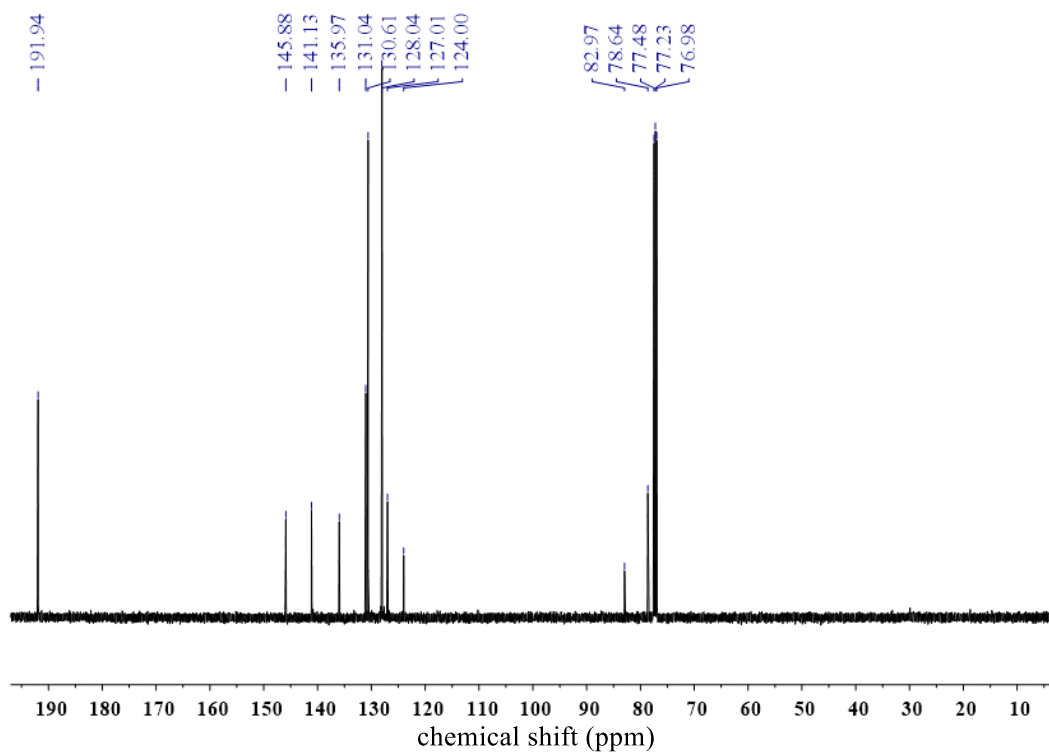

**Supplementary Figure 29.**  $^{13}\text{C}$  NMR (126 MHz,  $\text{CDCl}_3$ ) spectrum of 2d.

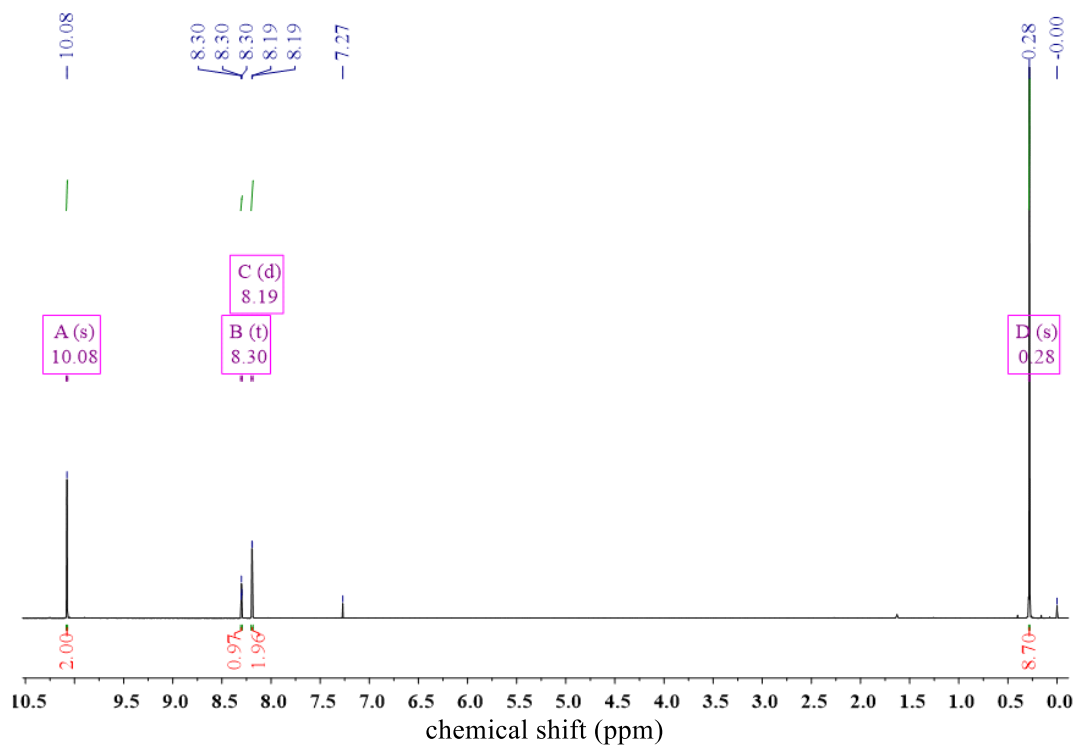

**Supplementary Figure 30.**  $^1\text{H}$  NMR (500 MHz,  $\text{CDCl}_3$ ) spectrum of 3b.

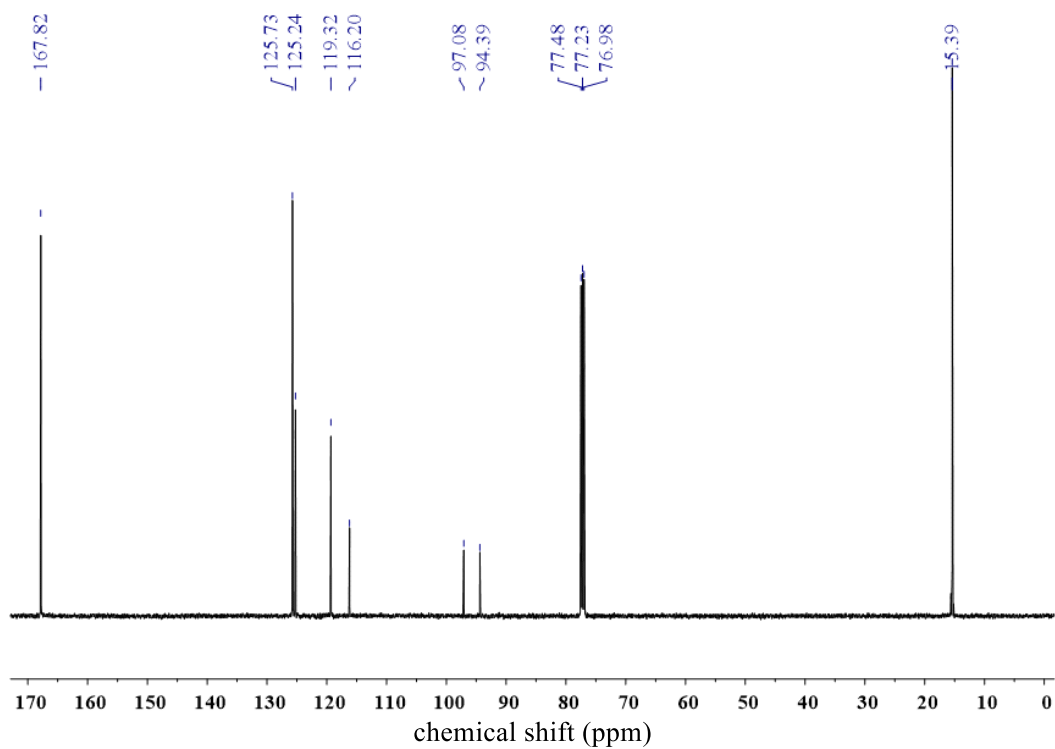

**Supplementary Figure 31.**  $^{13}\text{C}$  NMR (101 MHz,  $\text{CDCl}_3$ ) spectrum of 3b.

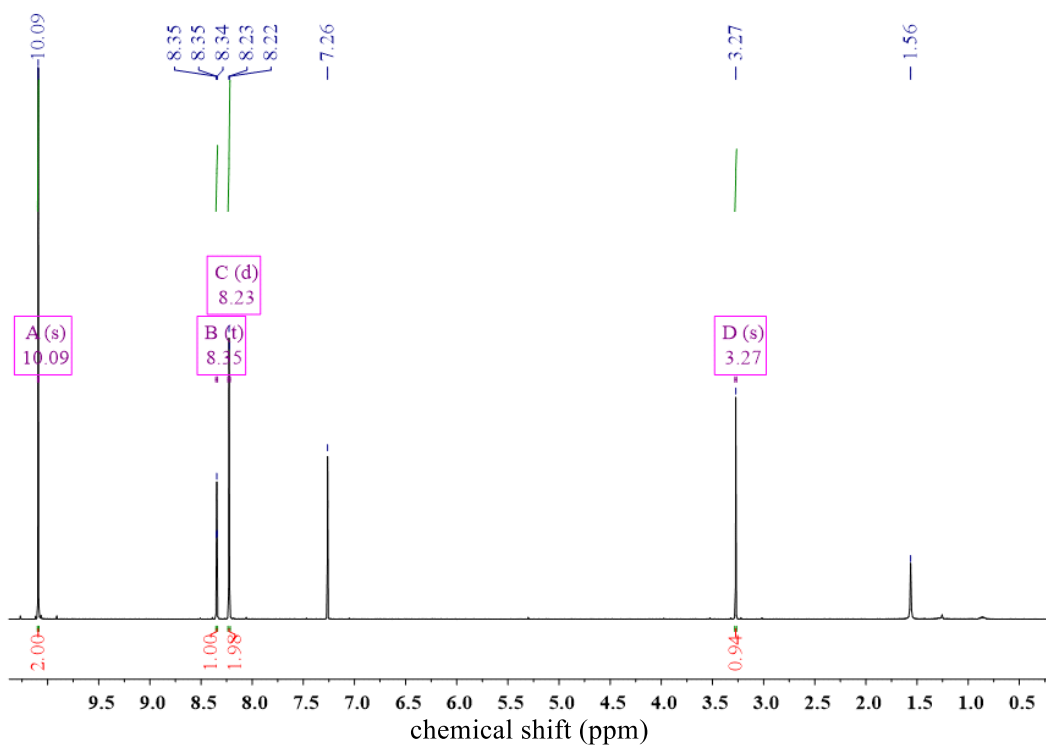

Supplementary Figure 32.  $^1\text{H}$  NMR (500 MHz,  $\text{CDCl}_3$ ) spectrum of 3c.

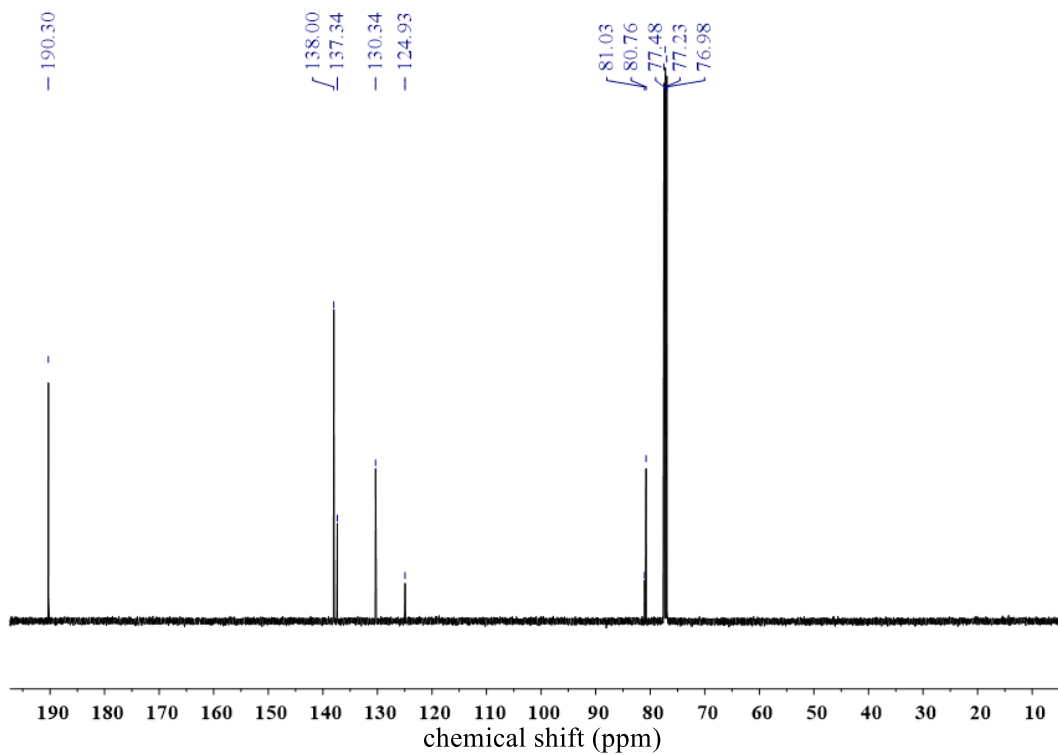

Supplementary Figure 33.  $^{13}\text{C}$  NMR (126 MHz,  $\text{CDCl}_3$ ) spectrum of 3c.

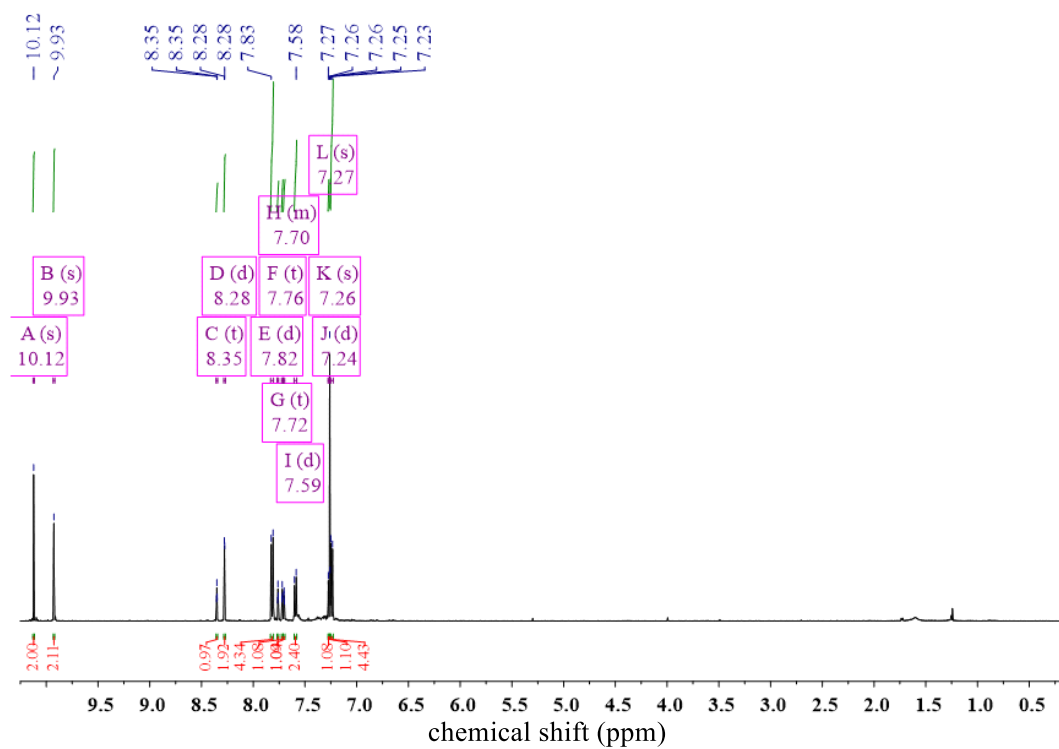

Supplementary Figure 34. <sup>1</sup>H NMR (500 MHz, CDCl<sub>3</sub>) spectrum of 4a.

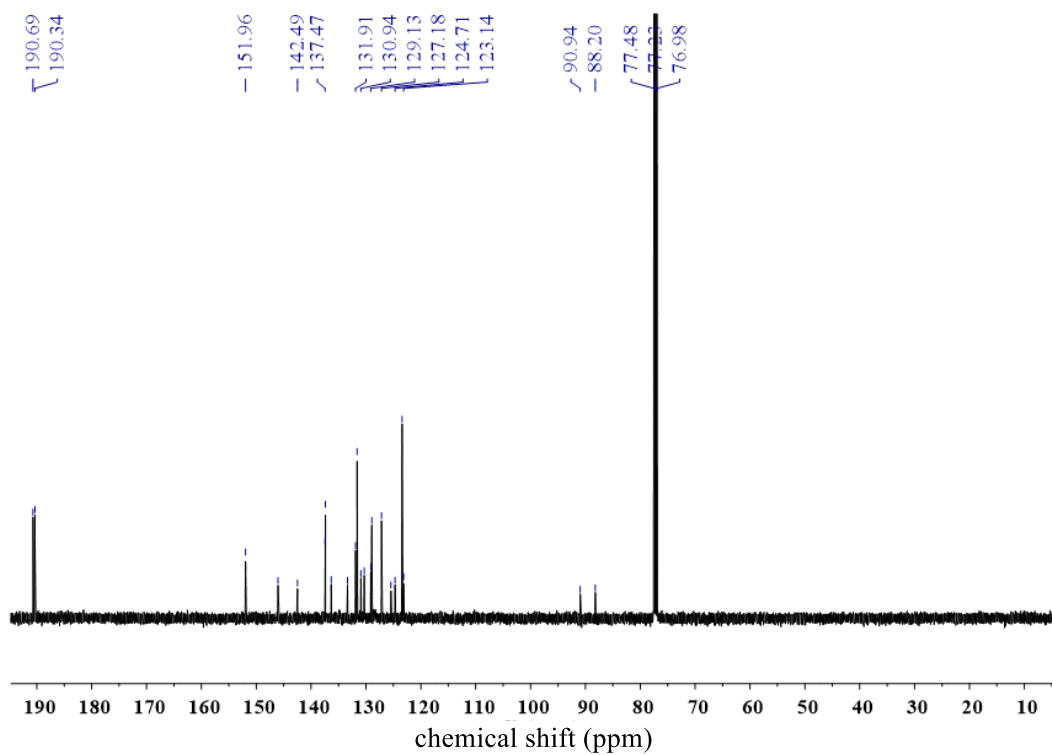

Supplementary Figure 35. <sup>13</sup>C NMR (126 MHz, CDCl<sub>3</sub>) spectrum of 4a.

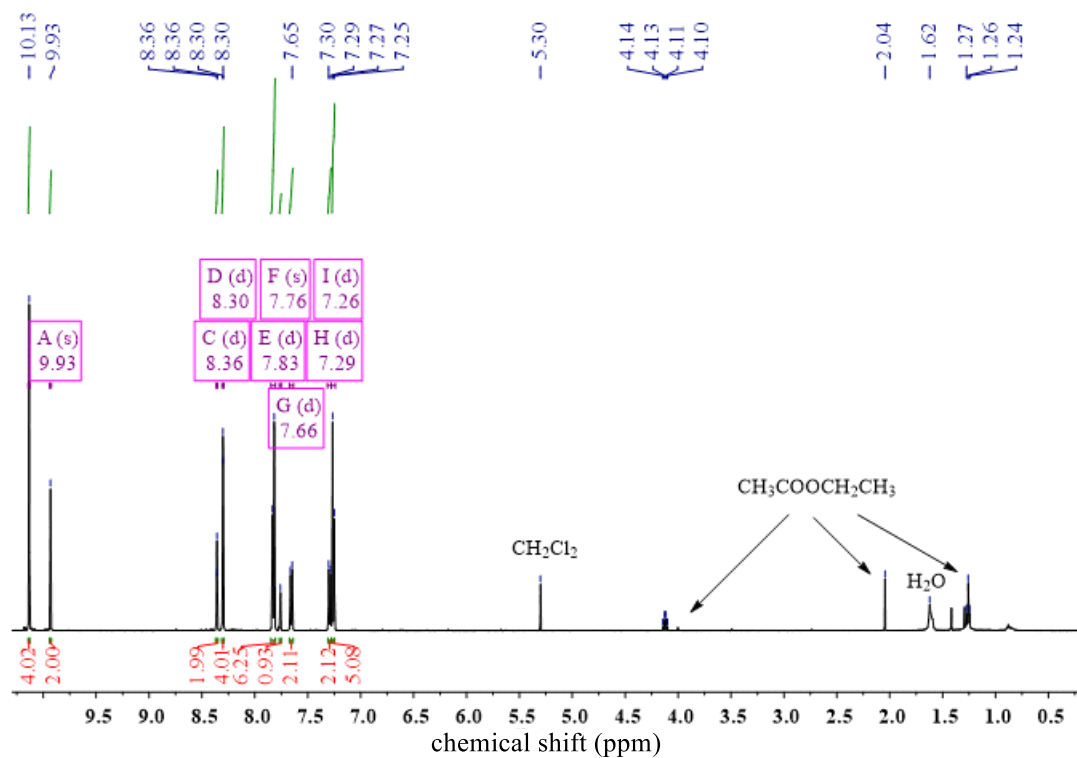

Supplementary Figure 36. <sup>1</sup>H NMR (500 MHz, CDCl<sub>3</sub>) spectrum of TPM.

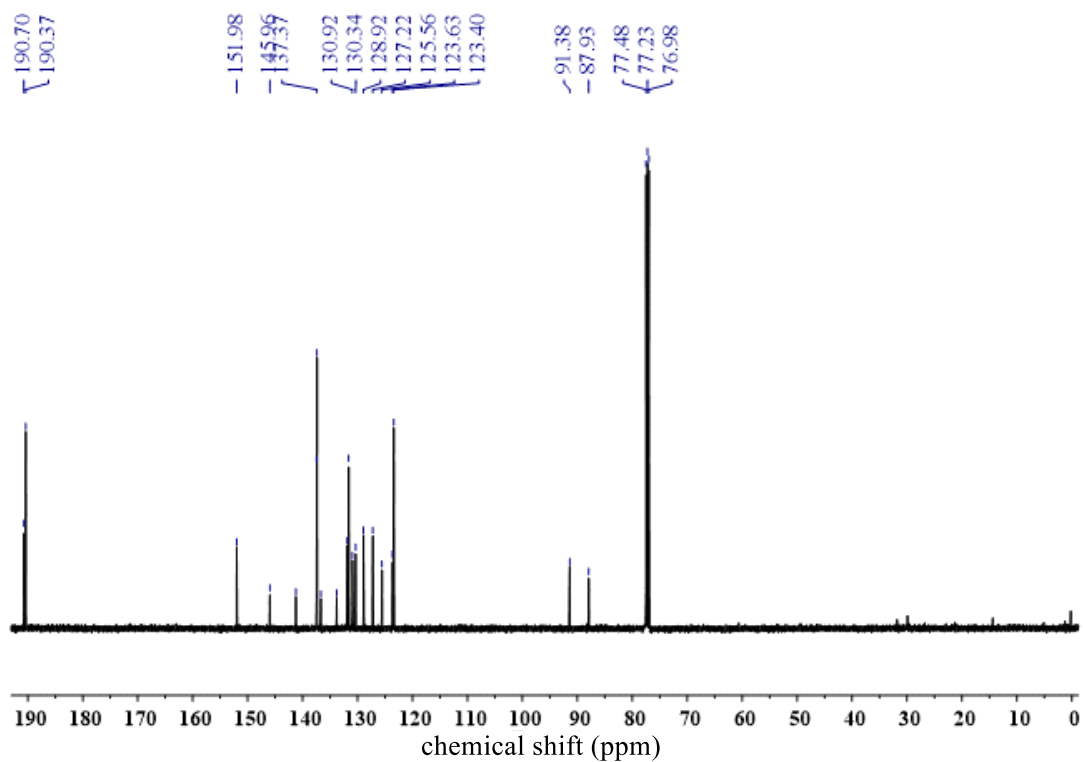

Supplementary Figure 37. <sup>13</sup>C NMR (126 MHz, CDCl<sub>3</sub>) spectrum of TPM.

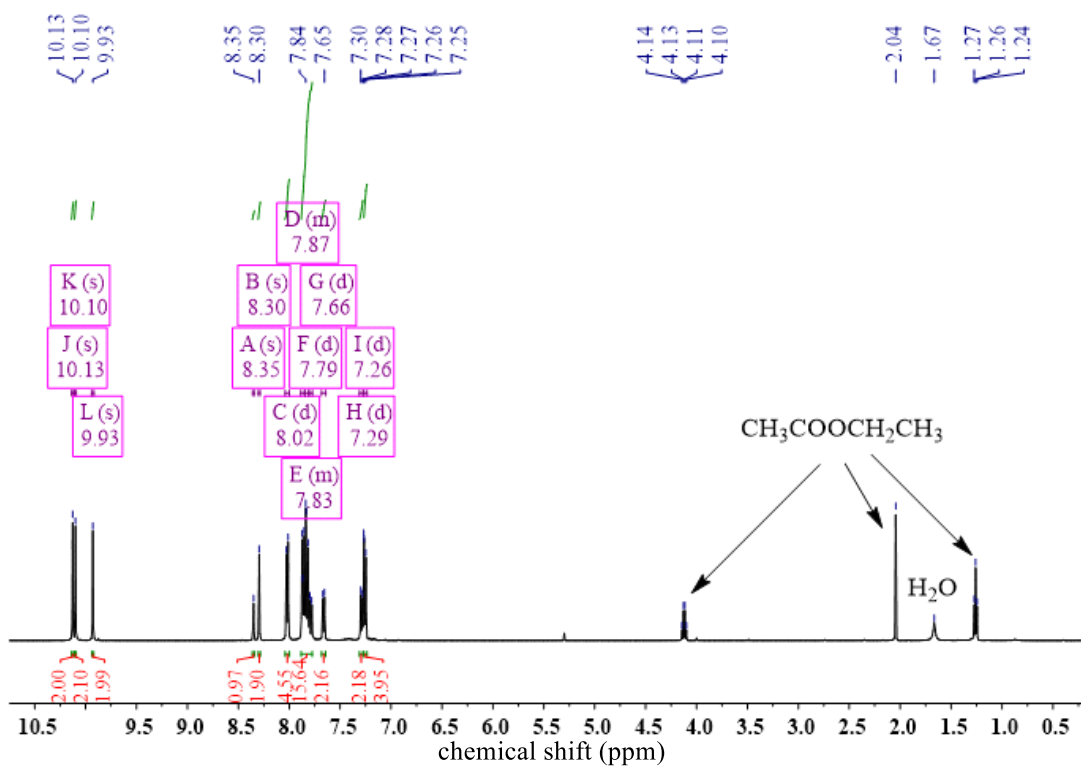

Supplementary Figure 38  $^1\text{H}$  NMR (500 MHz,  $\text{CDCl}_3$ ) spectrum of FPM.

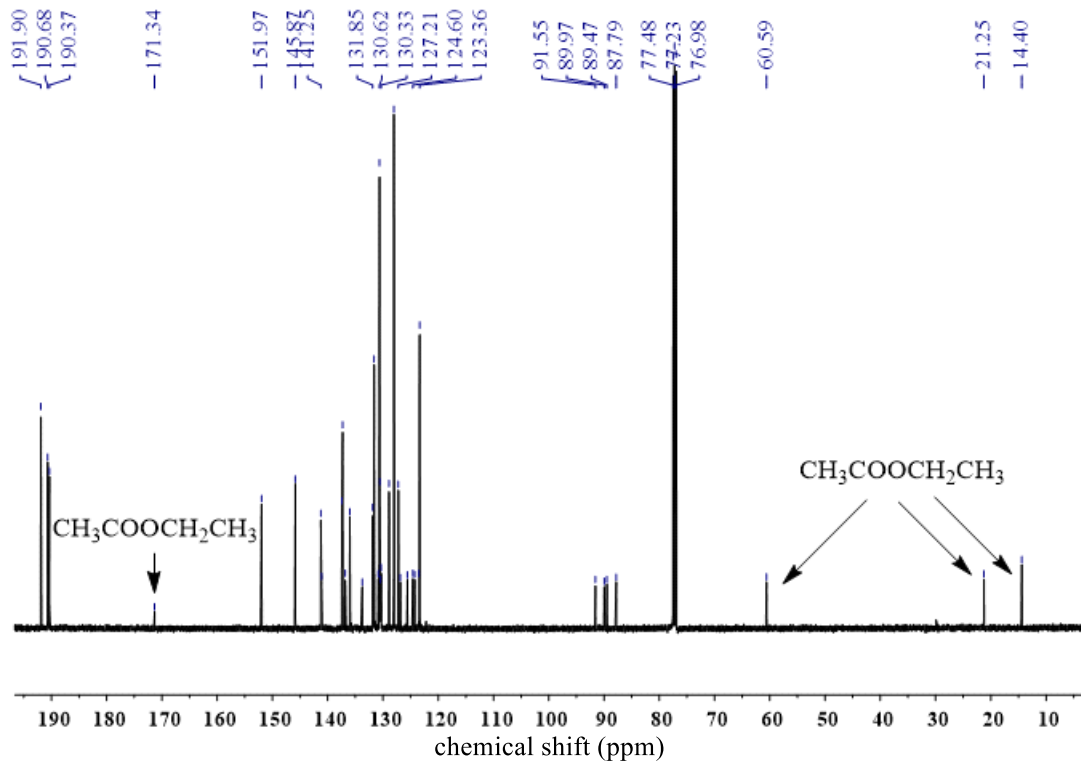

Supplementary Figure 39.  $^{13}\text{C}$  NMR (126 MHz,  $\text{CDCl}_3$ ) spectrum of FPM.



### Supplementary References

1. Zhao, Y. *et al.* A novel donor-acceptor molecule containing a cyclic triphenylamine dimer: synthesis, characterization, and application in memory device. *Tetrahedron* **68**, 1547-1551 (2012).
